# Supplementary material for: Viral and Host Small RNA Response to SARS-CoV-2 Infection
Source: MDPI journal article supplement (doi:10.3390/microbiolres13040056), 2022-10-10
Supplement: s1 [file s1]

miRDB predicted seed sequences of host miRNAs in SARS-CoV-2 genome (Wuhan strain)

|              |                                |                |                        |
|--------------|--------------------------------|----------------|------------------------|
| miRNA Name   | <a href="#">hsa-miR-210-3p</a> | miRNA Sequence | CTGUGCGUGUGACAGCGGCUGA |
| Target Score | 52                             | Seed Location  | 3773, 8887, 17460      |

3721 TATTTTGGT GCTGACCCTA TACATTCTTT AAGAGTTTGT GTAGATACTG TT**CGCACAAA**

8881 GATATT**ACGC** **ACAA**CTAATG GTGACTTTTT GCATTTCTTA CCTAGAGTTT TTAGTGCAGT

17401 GCCAGATTAC GTGCTAAGCA CTATGTGTAC ATTGGCGACC CTGCTCAATT ACCTGCACCA **CGCACAA**TTGC

|              |                              |                |                            |
|--------------|------------------------------|----------------|----------------------------|
| miRNA Name   | <a href="#">hsa-miR-378f</a> | miRNA Sequence | ACUGGACUUGGAGCCAGAAG       |
| Target Score | 55                           | Seed Location  | 11047, 17534, 28508, 29106 |

11041 AGTTTT**AGTC** **CAGAG**TACTC AATGGTCTTT GTTCTTTTTT TTGTATGAAA ATGCCTTTTT

17521 ATGAAACTA TAG**GTCCAGA** CATGTTCCTC GGAAC TTGTC GGC GTTGTCC TGCTGAAATT

28501 CAATAG**CAGT** **CCAGA**TGACC AAATTGGCTA CTACCGAAGA GCTACCAGAC GAATTCGTGG

29101 ACGTG**GTCCA** **GA**ACAAACCC AAGGAAATTT TGGGGACCAG GAACTAATCA GACAAGGAAC

|               |                                |                |                                                                                              |
|---------------|--------------------------------|----------------|----------------------------------------------------------------------------------------------|
| miRNA Name    | <a href="#">hsa-miR-30d-5p</a> | miRNA Sequence | UGUAAACAUCCCCGACUGGAAG                                                                       |
| Previous Name | hsa-miR-30d                    |                |                                                                                              |
| Target Score  | 95                             | Seed Location  | 3451, 4974, 7939, 9354, 10426, 11657, 16863, 19567, 19710, 20069, 20360, 26729, 27955, 28140 |

3421 AAAACCAACA GTGGTTGTTA ATGCAGCCAA **TGTTTAC**CTT AAACATGGAG GAGGTGTTGC

4921 CTTTGACAAT CTTAAGACAC TTCTTTCTTT GAGAGAAGTG AGGACTATTA AGG**TGTTTAC** AACAGTAGAC

7921 ATCTGCAAAA TCAGCGTCTG **TTTACT**TACAG TCAGCTTATG TGTCAACCTA TACTGTTACT

9301 ATCTTTACCA GGAGTTTCT GTGGTGTAGA TGCTGTAAAT TTA CTACTA ATAT**TGTTTAC** ACCACTAATT

10381 ACAGACTTTT TCAGTGTTAG CTGTGTACAA TGGTTCACCA TCTGG**TGTTT** ACCAATGTGC

11641 TTACTTTGGC CTCTTT**TGTT** **TACT**CAACCG CTACTTTAGA CTGACTCTTG GTGTTTATGA

16861 GT**TGTTTAC** GAGGTACAAC AACTTACAAA TTAAATGTTG GTGATTATTT TGTGCTGACA

19561 TTGTGG**GTTT** **ACAA**ACAATT TGATACTTAT AACCTCTGGA ACAC TTTTAC AAGACTTCAG

19681 GAAGTACCAG TTTCTATCAT TAATAACACT **GTTTAC**CAA AAGTTGATGG TGTGATGTA

20041 GTTCTTATTA CAGAAGGTAG TGTAAAG**GT** **TTACA**ACCAT CTGTAGGTCC CAAACAAGCT

20341 AGTCATAGTC AGTTAGGTGG **TTTACA**TCTA CTGATTGGAC TAGCTAAACG TTTAAGGAA

26701 TAACTTTAGC TTGTTTGTG CTGTCTGCTG **TTTACA**GAAT AAATTGGATC ACCGGTGGAA

27901 TTCTTGTTTT CTTAGGAATC ATCACAAC TGCTGCATT TCACCAAGAA TGTA**GTTTAC** AGTCATGTAC

28081 ATGAGGCTGG TTCTAAATCA CCCATTCACT ACATCGATAT CGGTAATTAT ACAGTTTCCT **GTTTAC**CTT

| Rank | Target score | miRNAs                         |
|------|--------------|--------------------------------|
| 42   | 95           | <a href="#">hsa-miR-30c-5p</a> |
| 43   | 95           | <a href="#">hsa-miR-30b-5p</a> |
| 45   | 95           | <a href="#">hsa-miR-30e-5p</a> |
| 46   | 95           | <a href="#">hsa-miR-30d-5p</a> |
| 47   | 95           | <a href="#">hsa-miR-30a-5p</a> |

|              |                                |                |                                              |
|--------------|--------------------------------|----------------|----------------------------------------------|
| miRNA Name   | <a href="#">hsa-miR-152-3p</a> | miRNA Sequence | UCAGUGCAUGACAGAA CUUGG                       |
| Target Score | 89                             | Seed Location  | 714, 1299, 12752, 12811, 24187, 27415, 27555 |

661 TGGCCATAGT TACGGCGCCG ATCTAAAGTC ATTTGACTTA GGCGACGAGC TTG**GCACTGA**

**721** TCCTTATGAA GATTTTCAAG AAAACTGGAA CACTAAACAT AGCAGTGGTG TTACCCGTGA

1261 GACGGGCGAT TTTGTTAAAG CCACTTGCGA ATTTTGTGGC **ACTGAGAATT** TGAATAAAGA

12721 GTCTTGTGCT GCCGGTACTA CACAACTGC **TGCACTGAT** GACAATGCGT TAGCTTACTA

12781 CAACACAACA AAGGGAGGTA GGTTCGTACT **TGCACTGTTA** TCCGATTAC AGGATTTGAA

24181 CACTTCTGCA **CTGTTAGCGG** GTACAATCAC TTCTGGTTGG ACCTTTGGTG CAGGTGCTGC

27361 GAAGAGCAAC CAATGGAGAT TGATTAAACG AACATGAAAA TTATTCCTTT CTG**GCACTG**

**27421** ATAACACTCG CTACTTGTGA GCTTTATCAC TACCAAGAGT GTGTTAGAGG TACAACAGTA

27541 GCTGATAACA AATT**TGCACT** **GA**CTTGCTTT AGCACTCAAT TTGCTTTTGC TTGTCCTGAC

|               |                                 |                      |                                                      |
|---------------|---------------------------------|----------------------|------------------------------------------------------|
| miRNA Name    | <a href="#">hsa-miR-148a-5p</a> | miRNA Sequence       | <b>AAAGUUCUGAGACACUCCGACU</b>                        |
| Previous Name | hsa-miR-148a*                   |                      |                                                      |
| Target Score  | 61                              | <b>Seed Location</b> | 3308, 5708, 15779, 24780, 25165, 25387, 26239, 27675 |

3301 AGAGATGGA **CTTA**CACCAG TTGTTAGAC TATTGAAGTG AATAGTTTTA GTGGTTATTT

5701 TCAGTATGA **CTTA**AGCATG GTACATTAC TTGTGCTAGT GAGTACACTG GTAATTACCA

15721 GATGCTGTTG TGTGTTTCAA TAGCACTTAT GCATCTCAA GTCTAGTGGC TAGCATAA**AG**

**15781** **AACTT**TAAGT CAGTTCCTTA TTATCAAAAC AATGTTTTTA TGTCTGAAGC AAAATGTTGG

24721 TCAGTCAGCA CCTCATGGTG TAGTCTTCTT GCATGTGACT TATGTCCCTG CACAAGAAA**A**

**24781** **GAACTT**CACA ACTGCTCCTG CCATTTGTCA TGATGGAAAA GCACACTTTC CTCGTGAAGG

25141 AAATGAATCT CTCATCGATC TCCA**AGAACT** **TG**GAAAGTAT GAGCAGTATA TAAAATGGCC

25381 ATAAAC**GAAC** **TTAT**GGATTT GTTTATGAGA ATCTTCACAA TTGGAAGTGT AACTTTGAAG

26221 GCACAAGCTG ATGAGTACGA **ACTTA**TGTAC TCATTCGTTT CGGAAGAGAC AGGTACGTTA

27661 CAAGAGGAAG TTCA**AGAACT** **T**ACTCTCCA ATTTTCTTA TTGTTGCGGC AATAGTGTTT

|              |                               |                      |                                         |
|--------------|-------------------------------|----------------------|-----------------------------------------|
| miRNA Name   | <a href="#">hsa-miR-12136</a> | miRNA Sequence       | <b>GAAAAAGUCAUGGAGGCC</b>               |
| Target Score | 52                            | <b>Seed Location</b> | 8904, 10385, 11095, 26408, 27791, 28213 |

8881 GATATTACGC ACAACTAATG GTG**ACTTTTT** GCATTTCTTA CCTAGAGTTT TTAGTGCAGT

10321 TAAGGTTGAT ACAGCCAATC CTAAGACACC TAAGTATAAG TTTGTTGCA TTCAACCAGG

10381 ACAG**ACTTTT** **TC**AGTGTTAG CTGTTACAA TGGTTCACCA TCTGGTGTTC ACCAATGTGC

11041 AGTTTTAGTC CAGAGTACTC AATGGTCTTT GTTCTTTTTT TTGTATGAAA ATGC**CTTTTT**

**11101** **AC**TTTTTGCT ATGGGTATTA TTGCTATGTC TGCTTTTGCA ATGATGTTTG TCAAACATAA

27781 TCTATTGTG **CTTTTTAGCC** TTTCTGCTAT TCCTTGTTTT AATTATGCTT ATTATCTTTT

28201 CGTTCTATGA AG**ACTTTTTTA** GAGTATCATG ACGTTCGTGT TGTTTTAGAT TTCATCTAAA

|               |                                |                      |                                                                         |
|---------------|--------------------------------|----------------------|-------------------------------------------------------------------------|
| miRNA Name    | <a href="#">hsa-miR-222-5p</a> | miRNA Sequence       | <b>CUCAGUAGCCAGUGUAGAUCU</b>                                            |
| Previous Name | hsa-miR-222*                   |                      |                                                                         |
| Target Score  | 86                             | <b>Seed Location</b> | 3115, 4191, 6345, 7713, 11976, 15566, 16614, 16655, 20368, 23277, 25959 |

3061 AGAAGGTGAT TGTGAAGAAG AAGAGTTTGA GCCATCAACT CAATATGAGT ATGG**TACTGA**

**3121** **AG**ATGATTAC CAAGGTAAAC CTTTGGAATT TGGTGCCACT TCTGCTGCTC TTCAACCTGA

4141 AGAGGGTGTT TTAAGTCTG TGGTTATACC TACTAAAAAG GCTGGTGGCA **CTACTGAAAT**

6301 TCTTTGGAGC ACAAACCAG TTGAAACATC AAATTCGTTT GATG**TACTGA** **AG**TCAGAGGA

7681 CTTGTCACCTA CAGTTTAAAA GACCAATAAA TC**CTACTGAC** CAGTCTTCTT ACATCGTTGA

11941 CCAGTTACAC AATGACATTC TCTTAGCTAA AGATACTACT GAAGCCTTTG AAAAAATGGT  
15541 ACGGCCAATG TTAATGCACT TTTATCTACT GATGGTAACA AAATTGCCGA TAAGTATGTC  
16561 ATTGCAACAT GTGACTGGAC AAATGCTGGT GATTACATTT TAGCTAACAC CTGTACTGAA  
16621 AGACTCAAGC TTTTTCAGC AGAAACGCTC AAAGCTACTG AGGAGACATT TAAACTGTCT  
20341 AGTCATAGTC AGTTAGGTGG TTTACATCTA CTGATTGGAC TAGCTAAACG TTTTAAGGAA  
23221 TGAGTCTAAC AAAAAGTTTC TGCCTTTCCA ACAATTTGGC AGAGACATTG CTGACACTAC  
23281 TGAATGCTGTC CGTGATCCAC AGACACTTGA GATTCTTGAC ATTACACCAT GTTCTTTTGG  
25921 AGTCCTATTT CTGAACATGA CTACCAGATT GGTGGTTATA CTGAAAAATG GGAATCTGGA

|               |                 |                |                                                           |
|---------------|-----------------|----------------|-----------------------------------------------------------|
| miRNA Name    | hsa-miR-181b-5p | miRNA Sequence | AACAUUCAUUGCUGUCGGUGGGU                                   |
| Previous Name | hsa-miR-181b    |                |                                                           |
| Target Score  | 70              | Seed Location  | 7410, 7529, 8221, 9016, 11400, 12216, 18516, 20783, 27948 |

7381 acaaattggcc ccgatttcag ctatggttag aatgtacatc ttctttgcat cattttatta  
7501 ttacaaacgt aatagagcaa caagagtcga atgtacaact attgttaatg gtgttagaag  
8161 ttttatttca gcagctcggc aagggtttgt tgattcagat gtagaaacta aagatgttgt  
8221 tgaatgtcctt aaattgtcac atcaatctga catagaagtt actggcgata gttgtaataa  
9001 ttgtgttttg gctgctgaat gtacaatttt taaagatgct tctggtaagc cagtaccata  
11341 aatccttatg acagcaagaa ctgtgtatga tgatggtgct aggagagtgt ggacacttat  
11401 gaatgtcctg aactcgttt ataaagttaa ttatggtaat gctttagatc aagccatttc  
12181 ttctgaagtt gttcttaaaa agttgaagaa gtcttgaat gtggctaaat ctgaatttga  
18481 cacctcatat cacttatgta caaaggactt ccttgaatg tagtgcgtat aaagattgta  
20761 acattaccta aaggcataat gatgaatgtc gcaaaatata ctcaactgtg tcaatattta  
27901 ttcttgtttt cttaggaatc atcacaactg tagctgcatt tcaccaagaa tgtagtttac

|              |                              |                |                                                                                      |
|--------------|------------------------------|----------------|--------------------------------------------------------------------------------------|
| miRNA Name   | <a href="#">hsa-miR-4288</a> | miRNA Sequence | UUGUCUGCUGAGUUUCC                                                                    |
| Target Score | 99                           | Seed Location  | 1018, 3257, 3392, 4230, 5539, 12352, 14838, 19006, 22783, 24574, 24912, 27657, 29149 |

29101 acgtgggtcca gaacaaaccc aaggaaattt tggggaccag gaactaatca gacaaggaac

|               |                                |                |                                                                                                            |
|---------------|--------------------------------|----------------|------------------------------------------------------------------------------------------------------------|
| miRNA Name    | <a href="#">hsa-miR-195-5p</a> | miRNA Sequence | UAGCAGCACAGAAUAUUGGC                                                                                       |
| Previous Name | hsa-miR-195                    |                |                                                                                                            |
| Target Score  | 99                             | Seed Location  | 3163, 5384, 8458, 8614, 13090, 14562, 14781, 19857, 24094, 24634, 25683, 26723, 28921, 28935, 28938, 29023 |

|               |                               |                |                        |
|---------------|-------------------------------|----------------|------------------------|
| miRNA Name    | <a href="#">hsa-miR-16-5p</a> | miRNA Sequence | UAGCAGCACGUAAAUAUUGGCG |
| Previous Name | hsa-miR-16                    |                |                        |

|               |                                |                |                      |
|---------------|--------------------------------|----------------|----------------------|
| miRNA Name    | <a href="#">hsa-miR-15b-5p</a> | miRNA Sequence | UAGCAGCAUCAUGGUUUACA |
| Previous Name | hsa-miR-15b                    |                |                      |

|               |                                |                |                       |
|---------------|--------------------------------|----------------|-----------------------|
| miRNA Name    | <a href="#">hsa-miR-15a-5p</a> | miRNA Sequence | UAGCAGCAUAUUGGUUUUGUG |
| Previous Name | hsa-miR-15a                    |                |                       |

|            |                                 |                |                        |
|------------|---------------------------------|----------------|------------------------|
| miRNA Name | <a href="#">hsa-miR-6838-5p</a> | miRNA Sequence | AAGCAGCAGUGGCAAGACUCCU |
|------------|---------------------------------|----------------|------------------------|

|               |                                |                |                        |
|---------------|--------------------------------|----------------|------------------------|
| miRNA Name    | <a href="#">hsa-miR-497-5p</a> | miRNA Sequence | CAGCAGCACACUGUGGUUUUGU |
| Previous Name | hsa-miR-497                    |                |                        |

|               |                                |                |                         |
|---------------|--------------------------------|----------------|-------------------------|
| miRNA Name    | <a href="#">hsa-miR-424-5p</a> | miRNA Sequence | CAGCAGCAAUUCAUGUUUUUGAA |
| Previous Name | hsa-miR-424                    |                |                         |

3121 agatgattac caaggtaac ctttgaatt tggtgccact tctgtgtgtc ttcaacctga

|              |                              |                |                                                                                                               |
|--------------|------------------------------|----------------|---------------------------------------------------------------------------------------------------------------|
| miRNA Name   | <a href="#">hsa-miR-3133</a> | miRNA Sequence | UAAAGAACUCUAAAAACCCAAU                                                                                        |
| Target Score | 98                           | Seed Location  | 2297, 3030, 3745, 6779, 6987, 7153, 7171, 9730, 10007, 11071, 13741, 14722, 15793, 16252, 21384, 23331, 23390 |

2281 ggagagtgtt cagacattct ttaagcttgt aaataaattt ttggctttgt gtgctgactc

|               |                               |                |                                                                                                                                                  |
|---------------|-------------------------------|----------------|--------------------------------------------------------------------------------------------------------------------------------------------------|
| miRNA Name    | <a href="#">hsa-miR-21-3p</a> | miRNA Sequence | CAACACCAUGCGAUGGGCUGU                                                                                                                            |
| Previous Name | hsa-miR-21*                   |                |                                                                                                                                                  |
| Target Score  | 98                            | Seed Location  | 766, 2074, 5920, 7549, 9247, 9571, 9769, 10423, 10958, 11689, 14448, 17668, 18379, 19728, 19917, 20037, 20169, 21664, 21826, 23005, 23065, 26061 |

|            |                                 |                |                        |
|------------|---------------------------------|----------------|------------------------|
| miRNA Name | <a href="#">hsa-miR-122b-3p</a> | miRNA Sequence | AAACACCAUUGUCACACUCCAC |
|------------|---------------------------------|----------------|------------------------|

721 tccttatgaa gattttcaag aaaactggaa cactaaacat agcagtgggtg ttaaccgtga

|              |                             |                |                                                                                                   |
|--------------|-----------------------------|----------------|---------------------------------------------------------------------------------------------------|
| miRNA Name   | <a href="#">hsa-miR-559</a> | miRNA Sequence | UAAAGUAAAUAUGCACCAAAA                                                                             |
| Target Score | 97                          | Seed Location  | 2733, 4025, 4531, 6783, 7774, 9508, 10962, 11641, 11672, 12950, 13644, 20196, 21886, 23026, 25807 |

2701 cttcacactc aaaggcgggtg caccaacaaa ggttactttt ggtgatgaca ctgtgataga

|              |                                   |                |                                                              |
|--------------|-----------------------------------|----------------|--------------------------------------------------------------|
| miRNA Name   | <a href="#">hsa-miR-196a-1-3p</a> | miRNA Sequence | CAACAACAUUAAACACCCGA                                         |
| Target Score | 97                                | Seed Location  | 1357, 1576, 2077, 3434, 4132, 5923, 6710, 8215, 8513, 10939, |

|  |  |  |                                                                      |
|--|--|--|----------------------------------------------------------------------|
|  |  |  | 11011, 16860, 18985, 21520, 21937, 25301, 25643, 25646, 26155, 28238 |
|--|--|--|----------------------------------------------------------------------|

1321 aggtgccact acttgtggtt acttacccca aaatgctgtt gttaaaattt attgtccagc

|              |                              |                |                                                                                                   |
|--------------|------------------------------|----------------|---------------------------------------------------------------------------------------------------|
| miRNA Name   | <a href="#">hsa-miR-548y</a> | miRNA Sequence | AAAAGUAAUCACUGUUUUUGCC                                                                            |
| Target Score | 97                           | Seed Location  | 2733, 4025, 4531, 6783, 7774, 9508, 10962, 11641, 11672, 12950, 13644, 20196, 21886, 23026, 25807 |

2701 cttcacactc aaaggcgggtg caccaacaaa ggttactttt ggtgatgaca ctgtgataga

|    |    |                                  |
|----|----|----------------------------------|
| 14 | 97 | <a href="#">hsa-miR-548y</a>     |
| 15 | 97 | <a href="#">hsa-miR-548w</a>     |
| 16 | 97 | <a href="#">hsa-miR-548o-5p</a>  |
| 17 | 97 | <a href="#">hsa-miR-548h-5p</a>  |
| 18 | 97 | <a href="#">hsa-miR-548d-5p</a>  |
| 19 | 97 | <a href="#">hsa-miR-548c-5p</a>  |
| 20 | 97 | <a href="#">hsa-miR-548bb-5p</a> |
| 21 | 97 | <a href="#">hsa-miR-548b-5p</a>  |
| 22 | 97 | <a href="#">hsa-miR-548ay-5p</a> |
| 23 | 97 | <a href="#">hsa-miR-548au-5p</a> |
| 24 | 97 | <a href="#">hsa-miR-548ar-5p</a> |
| 25 | 97 | <a href="#">hsa-miR-548am-5p</a> |
| 26 | 97 | <a href="#">hsa-miR-548ak</a>    |
| 27 | 97 | <a href="#">hsa-miR-548ae-5p</a> |
| 28 | 97 | <a href="#">hsa-miR-548ad-5p</a> |
| 29 | 97 | <a href="#">hsa-miR-548aq-5p</a> |
| 31 | 96 | <a href="#">hsa-miR-548a-5p</a>  |
| 32 | 96 | <a href="#">hsa-miR-548as-5p</a> |
| 33 | 96 | <a href="#">hsa-miR-548ab</a>    |
| 36 | 96 | <a href="#">hsa-miR-548j-5p</a>  |
| 37 | 96 | <a href="#">hsa-miR-548i</a>     |
| 38 | 96 | <a href="#">hsa-miR-548ap-5p</a> |
| 51 | 94 | <a href="#">hsa-miR-548z</a>     |
| 52 | 94 | <a href="#">hsa-miR-548h-3p</a>  |
| 53 | 94 | <a href="#">hsa-miR-548d-3p</a>  |
| 54 | 94 | <a href="#">hsa-miR-548bb-3p</a> |
| 55 | 94 | <a href="#">hsa-miR-548ac</a>    |
| 56 | 93 | <a href="#">hsa-miR-548m</a>     |

|               |                                 |                |                                                                                                                       |
|---------------|---------------------------------|----------------|-----------------------------------------------------------------------------------------------------------------------|
| miRNA Name    | <a href="#">hsa-miR-302c-5p</a> | miRNA Sequence | UUUAACAUGGGGUACCUCUG                                                                                                  |
| Previous Name | hsa-miR-302c*                   |                |                                                                                                                       |
| Target Score  | 97                              | Seed Location  | 1273, 1360, 2209, 2425, 3627, 6243, 9816, 13997, 14249, 15241, 15461, 15548, 18544, 18987, 20061, 23403, 24448, 26427 |

1261 gacgggcgat ttgtttaaag ccacttgcga attttgtggc actgagaatt tgactaaaga

|              |                                 |                |                                                                                |
|--------------|---------------------------------|----------------|--------------------------------------------------------------------------------|
| miRNA Name   | <a href="#">hsa-miR-4684-3p</a> | miRNA Sequence | UGUUGCAAGUCGGUGGAGACGU                                                         |
| Target Score | 96                              | Seed Location  | 2912, 7098, 8103, 8988, 11891, 13033, 16562, 20757, 24983, 25632, 28671, 29492 |

2881 ctgtgttgtg gcagatgctg tcataaaaac ttgcaacca gtatctgaat tacttacacc

|            |                                |                |                        |
|------------|--------------------------------|----------------|------------------------|
| miRNA Name | <a href="#">hsa-miR-409-3p</a> | miRNA Sequence | GAAUGUUGCUCGGUGAACCCCU |
|------------|--------------------------------|----------------|------------------------|

|              |    |               |                                                                                  |
|--------------|----|---------------|----------------------------------------------------------------------------------|
| Target Score | 96 | Seed Location | 4990, 8386, 11785, 12403, 12525, 17285, 19760, 19803, 20759, 20829, 28767, 29694 |
|--------------|----|---------------|----------------------------------------------------------------------------------|

4981 aacagtagac **aacatta**acc tccacacgca agttgtggac atgtcaatga catatggaca

|               |                                |                |                                                                                                        |
|---------------|--------------------------------|----------------|--------------------------------------------------------------------------------------------------------|
| miRNA Name    | <a href="#">hsa-miR-186-5p</a> | miRNA Sequence | CAAAGAAUUCUCCUUUUGGGCU                                                                                 |
| Previous Name | hsa-miR-186                    |                |                                                                                                        |
| Target Score  | 95                             | Seed Location  | 2296, 3744, 6779, 6988, 7152, 7171, 7259, 9731, 10008, 13741, 14722, 15794, 21383, 21651, 23391, 27403 |

2281 ggagagtgtt cagac**attct** **tta**agcttgt aaataaatTTt ttggctttgt gtgctgactc

|               |                                |                |                                                                                   |
|---------------|--------------------------------|----------------|-----------------------------------------------------------------------------------|
| miRNA Name    | <a href="#">hsa-miR-545-3p</a> | miRNA Sequence | UCAGCAAACAUUUAUUGUGUGC                                                            |
| Previous Name | hsa-miR-545                    |                |                                                                                   |
| Target Score  | 95                             | Seed Location  | 6074, 13079, 14704, 22647, 22815, 23268, 25263, 25778, 25832, 27099, 28933, 29326 |

6061 tgataatatc aaat**tttgctg** atgatttaaa ccagttaact ggttataaga aacctgcttc

|              |                                 |                |                                                                                                                                 |
|--------------|---------------------------------|----------------|---------------------------------------------------------------------------------------------------------------------------------|
| miRNA Name   | <a href="#">hsa-miR-6835-3p</a> | miRNA Sequence | AAAAGCACUUUCUGUCUCCAG                                                                                                           |
| Target Score | 95                              | Seed Location  | 1719, 5814, 7009, 9381, 10905, 11440, 13074, 13827, 14622, 17594, 17647, 18891, 19340, 22288, 22733, 23856, 25719, 27565, 27788 |

1681 gatcgccatt attttggcat ctttttctgc ttccaca**gt** **gctttt**gtgg aaactgtgaa

|              |                              |                |                                                                                                       |
|--------------|------------------------------|----------------|-------------------------------------------------------------------------------------------------------|
| miRNA Name   | <a href="#">hsa-miR-3686</a> | miRNA Sequence | AUCUGUAAGAGAAAGUAAAUGA                                                                                |
| Target Score | 95                           | Seed Location  | 1949, 2414, 2860, 5362, 5932, 6435, 6522, 7060, 9295, 12680, 12883, 12912, 20048, 20592, 22416, 26732 |

1921 tgaaactgct caaaattctg tgcgtgtttt **acagaa**ggcc gctataacaa tactagatgg

|               |                                |                |                                                                          |
|---------------|--------------------------------|----------------|--------------------------------------------------------------------------|
| miRNA Name    | <a href="#">hsa-miR-505-3p</a> | miRNA Sequence | CGUCAACACUUGCUGGUUCCU                                                    |
| Previous Name | hsa-miR-505                    |                |                                                                          |
| Target Score  | 95                             | Seed Location  | 152, 8488, 10609, 10792, 14208, 15648, 17580, 18123, 18156, 18612, 18906 |

121 cacgcagtat aattaataac taattactgt **cgttgaca**gg acacgagtaa ctgctctatc

|              |                             |                |                                                                                      |
|--------------|-----------------------------|----------------|--------------------------------------------------------------------------------------|
| miRNA Name   | <a href="#">hsa-miR-632</a> | miRNA Sequence | GUGUCUGCUUCCUGUGGGA                                                                  |
| Target Score | 94                          | Seed Location  | 1018, 3257, 3392, 4230, 5539, 12352, 14838, 19006, 22783, 24574, 24912, 27657, 29149 |

3241 cggcagtgag gacaat**caga** **caa**ctactat tcaaacaatt gttgaggttc aacctcaatt

|               |                                 |                |                                                           |
|---------------|---------------------------------|----------------|-----------------------------------------------------------|
| miRNA Name    | <a href="#">hsa-miR-374a-5p</a> | miRNA Sequence | UUAUAAUACAACCUGAUAAGUG                                    |
| Previous Name | hsa-miR-374,hsa-miR-374a        |                |                                                           |
| Target Score  | 93                              | Seed Location  | 1749, 5960, 6177, 6949, 20152, 22821, 22827, 22905, 26483 |

1741 aggtttggat **tataa**agcat tcaaacaat tgttgaatcc tgtggttaatt ttaaagttac

|            |                                 |                |                       |
|------------|---------------------------------|----------------|-----------------------|
| miRNA Name | <a href="#">hsa-miR-4778-3p</a> | miRNA Sequence | UCUUCUCCUUUGCAGAGUUGA |
|------------|---------------------------------|----------------|-----------------------|

|              |    |               |                                                                                                    |
|--------------|----|---------------|----------------------------------------------------------------------------------------------------|
| Target Score | 93 | Seed Location | 3056, 3059, 3074, 3077, 3179, 3189, 3191, 3404, 3974, 4643, 6410, 9791, 12205, 18268, 29390, 29392 |
|--------------|----|---------------|----------------------------------------------------------------------------------------------------|

3001 tgagtttaaa ttggcttcac atatgtattg ttctttctac cctccagatg aggatgaaga  
3061 agaaggtgat tgtgaagaag aagagtttga gccatcaact caatatgagt atgggtactga  
3121 agatgattac caaggtaaac ctttggaatt tgggtgccact tctgctgctc ttcaacctga  
3181 agaagagcaa gaagaagatt ggtagatga tgatagtcaa caaactgttg gtcaacaaga

|              |                              |                |                                                                                                       |
|--------------|------------------------------|----------------|-------------------------------------------------------------------------------------------------------|
| miRNA Name   | <a href="#">hsa-miR-4422</a> | miRNA Sequence | AAAAGCAUCAGGAAGUACCCA                                                                                 |
| Target Score | 93                           | Seed Location  | 5815, 7009, 10906, 11439, 12359, 13826, 17646, 18684, 20608, 22288, 22733, 23857, 25259, 25718, 27565 |

6961 gtttttacta ttaagtgttt gcctaggttc tttaatctac tcaaccgctg ctttaggtgt

|              |                              |                |                                                                    |
|--------------|------------------------------|----------------|--------------------------------------------------------------------|
| miRNA Name   | <a href="#">hsa-miR-4490</a> | miRNA Sequence | UCUGGUAAGAGAUUUGGGCAUA                                             |
| Target Score | 93                           | Seed Location  | 5755, 9305, 12486, 17930, 19817, 22835, 23978, 25942, 26025, 28543 |

9301 atctttacca ggagttttct gtggtgtaga tgctgtaaat ttacttacta atatgtttac

|              |                             |                |                                                                         |
|--------------|-----------------------------|----------------|-------------------------------------------------------------------------|
| miRNA Name   | <a href="#">hsa-miR-527</a> | miRNA Sequence | CUGCAAAGGGAAGCCCUUUC                                                    |
| Target Score | 93                          | Seed Location  | 2910, 7423, 7596, 8986, 11135, 11890, 16255, 16382, 17953, 24981, 25631 |

2881 ctgtgtgttg gcagatgctg tcataaaaac tttgcaacca gtatctgaat tacttacacc

|              |                                 |                |                                                                         |
|--------------|---------------------------------|----------------|-------------------------------------------------------------------------|
| miRNA Name   | <a href="#">hsa-miR-518a-5p</a> | miRNA Sequence | CUGCAAAGGGAAGCCCUUUC                                                    |
| Target Score | 93                              | Seed Location  | 2910, 7423, 7596, 8986, 11135, 11890, 16255, 16382, 17953, 24981, 25631 |

2881 ctgtgtgttg gcagatgctg tcataaaaac tttgcaacca gtatctgaat tacttacacc

|              |                              |                |                                                                                                                  |
|--------------|------------------------------|----------------|------------------------------------------------------------------------------------------------------------------|
| miRNA Name   | <a href="#">hsa-miR-5688</a> | miRNA Sequence | UAACAAACACCUGUAAAACAGC                                                                                           |
| Target Score | 93                           | Seed Location  | 1271, 5675, 7826, 8185, 9814, 10360, 10530, 11175, 11182, 12907, 13995, 14247, 18895, 19345, 19921, 21235, 21565 |

1261 gacgggcgat tttgttaag ccacttgcca attttgtggc actgagaatt tgactaaaga

|              |                                  |                |                                                                                   |
|--------------|----------------------------------|----------------|-----------------------------------------------------------------------------------|
| miRNA Name   | <a href="#">hsa-miR-548as-3p</a> | miRNA Sequence | UAAAACCCACAAUUAUGUUUGU                                                            |
| Target Score | 93                               | Seed Location  | 8851, 10058, 10499, 11291, 13348, 18213, 18780, 21099, 22216, 23015, 23957, 25217 |

8821 attgattgct gcagtcataa caagagaagt gggttttgtc gtgcttggtt tgcttggcac

|              |                                 |                |                                                                                                          |
|--------------|---------------------------------|----------------|----------------------------------------------------------------------------------------------------------|
| miRNA Name   | <a href="#">hsa-miR-7159-5p</a> | miRNA Sequence | UUCAACAAGGGUGUAGGAUGG                                                                                    |
| Target Score | 92                              | Seed Location  | 1770, 2584, 3279, 3970, 8187, 8217, 10608, 14441, 14742, 14864, 17579, 20525, 23008, 23875, 26064, 26099 |

1741 aggttttgat tataaagcat tcaaacaaat tgttggaatcc tgttgtaatt ttaaagttac

|            |                                 |                |                       |
|------------|---------------------------------|----------------|-----------------------|
| miRNA Name | <a href="#">hsa-miR-6512-5p</a> | miRNA Sequence | UACCAUAGAAGAGCUGGAAGA |
|------------|---------------------------------|----------------|-----------------------|

|              |    |               |                                                                                                                         |
|--------------|----|---------------|-------------------------------------------------------------------------------------------------------------------------|
| Target Score | 92 | Seed Location | 4723, 5248, 7546, 8896, 9766, 10477, 10874, 12172, 12474, 14077, 18237, 20034, 21782, 23002, 23062, 24280, 25245, 28024 |
|--------------|----|---------------|-------------------------------------------------------------------------------------------------------------------------|

4681 agctacagtt tctgtttctt cacctgatgc tgttacagcg tataatggtt atcttacttc

|               |                                |                |                                                                  |
|---------------|--------------------------------|----------------|------------------------------------------------------------------|
| miRNA Name    | <a href="#">hsa-miR-29c-3p</a> | miRNA Sequence | UAGCACCAUUUGAAUUCGGUUA                                           |
| Previous Name | hsa-miR-29c                    |                |                                                                  |
| Target Score  | 92                             | Seed Location  | 3727, 4519, 8329, 9379, 11374, 16284, 19479, 20868, 22342, 28642 |

3721 tatttttgggt gctgacccta tacattcttt aagagtttgt gtagatactg ttcgcacaaa

|               |                                |                |                         |
|---------------|--------------------------------|----------------|-------------------------|
| miRNA Name    | <a href="#">hsa-miR-29b-3p</a> | miRNA Sequence | UAGCACCAUUUGAAUUCAGUGUU |
| Previous Name | hsa-miR-29b                    |                |                         |

|               |                                |                |                        |
|---------------|--------------------------------|----------------|------------------------|
| miRNA Name    | <a href="#">hsa-miR-29a-3p</a> | miRNA Sequence | UAGCACCAUCUGAAUUCGGUUA |
| Previous Name | hsa-miR-29a                    |                |                        |

|              |                             |                |                                                                                      |
|--------------|-----------------------------|----------------|--------------------------------------------------------------------------------------|
| miRNA Name   | <a href="#">hsa-miR-633</a> | miRNA Sequence | CUAAUAGUAUCUACCACAAUAAA                                                              |
| Target Score | 92                          | Seed Location  | 4964, 5262, 6581, 6967, 7875, 10457, 10649, 19049, 22188, 22388, 23717, 26021, 26541 |

4921 ctttgacaatcttaagacac ttctttcttt gagagaagtg aggactatta aggtgtttac

|               |                                 |                |                                                                     |
|---------------|---------------------------------|----------------|---------------------------------------------------------------------|
| miRNA Name    | <a href="#">hsa-miR-1226-3p</a> | miRNA Sequence | UCACCAGCCCUGUGUUCCCUAG                                              |
| Previous Name | hsa-miR-1226                    |                |                                                                     |
| Target Score  | 92                              | Seed Location  | 656, 2544, 2997, 4181, 5375, 9245, 9410, 15112, 16585, 22314, 22340 |

2521 aacagaggaa gttgtcttga aaactggtga tttacaacca ttagaacaac ctactagtga

|              |                              |                |                                                                           |
|--------------|------------------------------|----------------|---------------------------------------------------------------------------|
| miRNA Name   | <a href="#">hsa-miR-4310</a> | miRNA Sequence | GCAGCAUUCAUGUCCC                                                          |
| Target Score | 92                           | Seed Location  | 1352, 8757, 12064, 14032, 14779, 16070, 16319, 16582, 17791, 21187, 28733 |

1321 aggtgccact acttgtggtt acttacccca aatgctgtt gttaaaattt attgtccagc

|               |                                |                |                                                                                                                  |
|---------------|--------------------------------|----------------|------------------------------------------------------------------------------------------------------------------|
| miRNA Name    | <a href="#">hsa-miR-495-3p</a> | miRNA Sequence | AAACAAACAUGGUGCACUUCUU                                                                                           |
| Previous Name | hsa-miR-495                    |                |                                                                                                                  |
| Target Score  | 92                             | Seed Location  | 1271, 5675, 7826, 8185, 9814, 10360, 10530, 11175, 11182, 12907, 13995, 14247, 18895, 19345, 19921, 21235, 21565 |

1261 gacgggcat ttgtttaag ccacttgcga attttgtggc actgagaatt tgactaaaga

|               |                                 |                |                                                           |
|---------------|---------------------------------|----------------|-----------------------------------------------------------|
| miRNA Name    | <a href="#">hsa-miR-374b-5p</a> | miRNA Sequence | AUAUAAUACAACCUGCUAAGUG                                    |
| Previous Name | hsa-miR-374b                    |                |                                                           |
| Target Score  | 91                              | Seed Location  | 1749, 5960, 6177, 6949, 20152, 22821, 22827, 22905, 26483 |

1741 aggtttggat tataaagcat tcaaacaat tgttgaatcc tgtgtaatt ttaaagttac

|              |                              |                |                                                                                       |
|--------------|------------------------------|----------------|---------------------------------------------------------------------------------------|
| miRNA Name   | <a href="#">hsa-miR-4775</a> | miRNA Sequence | UUAAUUUUUGUUUCGUCACU                                                                  |
| Target Score | 91                           | Seed Location  | 1032, 2274, 4424, 6518, 15159, 16888, 20649, 20741, 21415, 22718, 27135, 27397, 29812 |

1021 gacacctttt gaaattaaat tggcaaagaa atttgacacc ttcaatgggg aatgtccaaa



|              |                              |                |                                                                         |
|--------------|------------------------------|----------------|-------------------------------------------------------------------------|
| miRNA Name   | <a href="#">hsa-miR-1283</a> | miRNA Sequence | UCUACAAAGGAAAGCGCUUUCU                                                  |
| Target Score | 91                           | Seed Location  | 51, 7464, 12567, 13648, 13933, 14138, 14458, 14851, 15967, 18963, 19232 |

1 attaaagggtt tataccttcc caggtatacaa accaaccaac ttctgatctc **ttgtagatct**

|               |                                |                |                                                   |
|---------------|--------------------------------|----------------|---------------------------------------------------|
| miRNA Name    | <a href="#">hsa-miR-628-3p</a> | miRNA Sequence | UCUAGUAAGAGUGGCAGUCGA                             |
| Previous Name | hsa-miR-628                    |                |                                                   |
| Target Score  | 91                             | Seed Location  | 1971, 6810, 7976, 8503, 9078, 12339, 14602, 18327 |

1921 tgaaactgct caaaattctg tgcgtgtttt acagaaggcc gctataacaa **tactagatgg**

|               |                                |                |                                                                    |
|---------------|--------------------------------|----------------|--------------------------------------------------------------------|
| miRNA Name    | <a href="#">hsa-miR-141-3p</a> | miRNA Sequence | UAACACUGUCUGGUAAAGAUGG                                             |
| Previous Name | hsa-miR-141                    |                |                                                                    |
| Target Score  | 91                             | Seed Location  | 2515, 7742, 10392, 11332, 14396, 18120, 20059, 22695, 23347, 23723 |

10381 acagactttt t**cagtgttag** cttgttacaa tggttcacca tctggtgttt accaatgtgc

|              |                              |                |                                                                            |
|--------------|------------------------------|----------------|----------------------------------------------------------------------------|
| miRNA Name   | <a href="#">hsa-miR-1305</a> | miRNA Sequence | UUUCAAACUCUAAUGGGAGAGA                                                     |
| Target Score | 91                           | Seed Location  | 431, 1127, 1442, 2537, 6320, 6620, 8303, 11988, 16835, 19748, 20527, 22468 |

421 cttagtagaa **gttgaaaa**ag gcgttttgcc tcaacttgaa cagccctatg tgttcatcaa
