# Supplementary material for: Viral and Host Small RNA Response to SARS-CoV-2 Infection
Source: MDPI journal article supplement (doi:10.3390/microbiolres13040056), 2022-10-10
Supplement: s1 [file s1]

Supplementary material for

**Viral and host small RNA response to SARS-CoV-2 infection**

Guihua Sun<sup>1,2,\*</sup>, Qi Cui<sup>2</sup>, Gustavo Garcia Jr.<sup>3,4</sup>, Elizabeth M. Lizhar<sup>1</sup>, Vaithilingaraja

Arumugaswami<sup>3,4</sup>, Yanhong Shi<sup>2,\*</sup>, Arthur D. Riggs<sup>1</sup>

## 1. Supplementary Figures:

**Figure S1. IGV view of small RNAs from SARS-CoV-2 infection of HEK293T-hACE2 cells aligned to the SARS-CoV-2 genome.** (A) Reads mapped to the positive genome of SARS-CoV-2; (B) Reads mapped to the negative genome of SARS-CoV-2; (C) Reads coverage; (D) Reads coverage at the E to ORF10 region. Mock 1& Mock 2: replicates 1 & 2 data for mock infection of HEK293T-hACE2 cells; CoV1 & CoV2: replicates 1 & 2 data for SARS-CoV-2 infection of HEK293T-hACE2 cells.

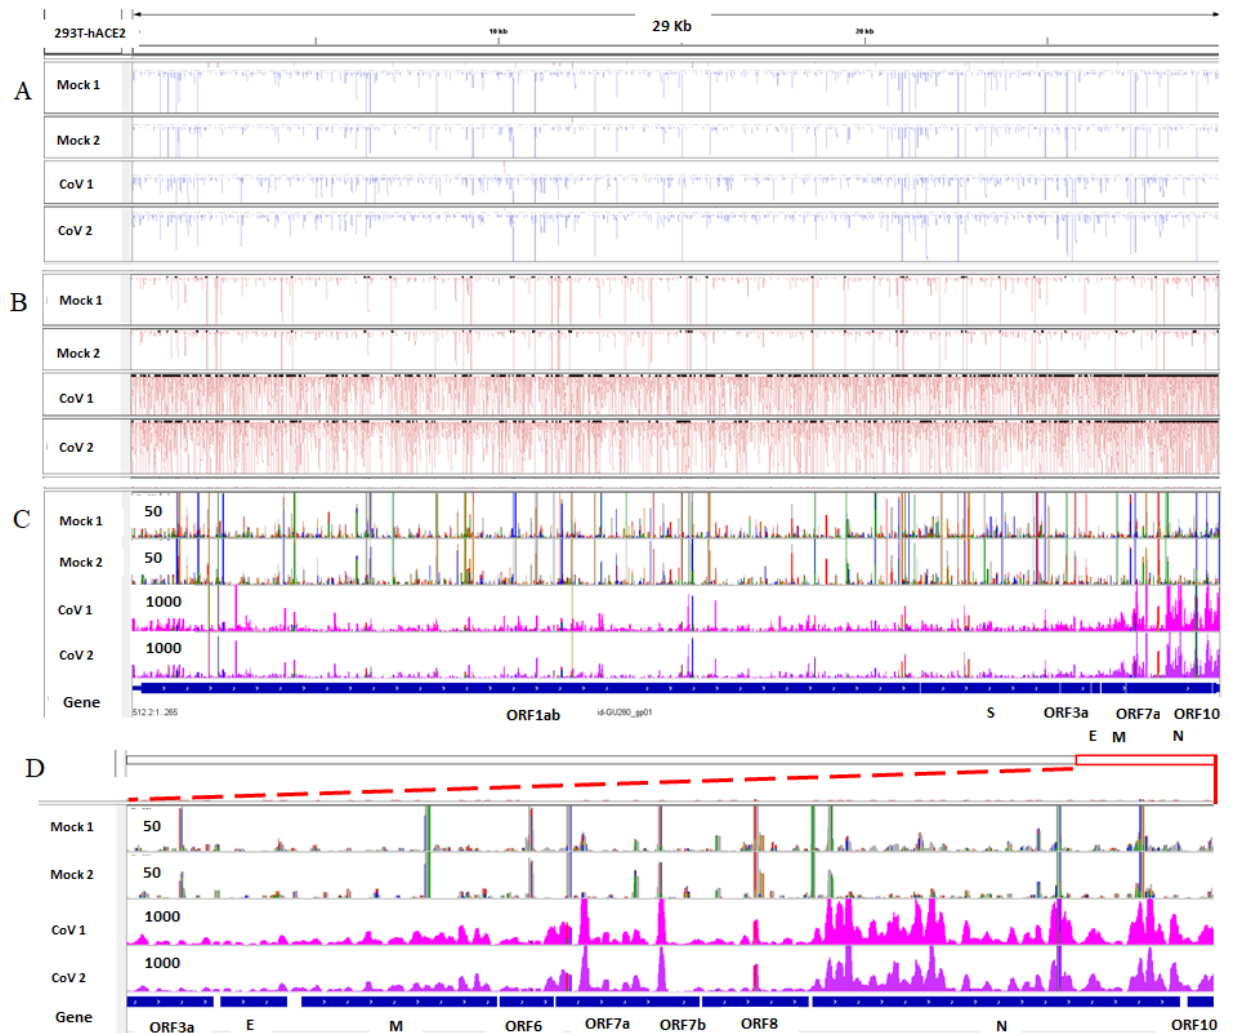

**Figure S2. IGV view of ChIRP data of SARS-CoV-2-infected Vero E6 and Huh7.5 cells.**

(A) Reads mapped to the negative genome of SARS-CoV-2; (B) Reads mapped to the positive genome of SARS-CoV-2; (C) Reads coverage; (D) Reads coverage at the E to

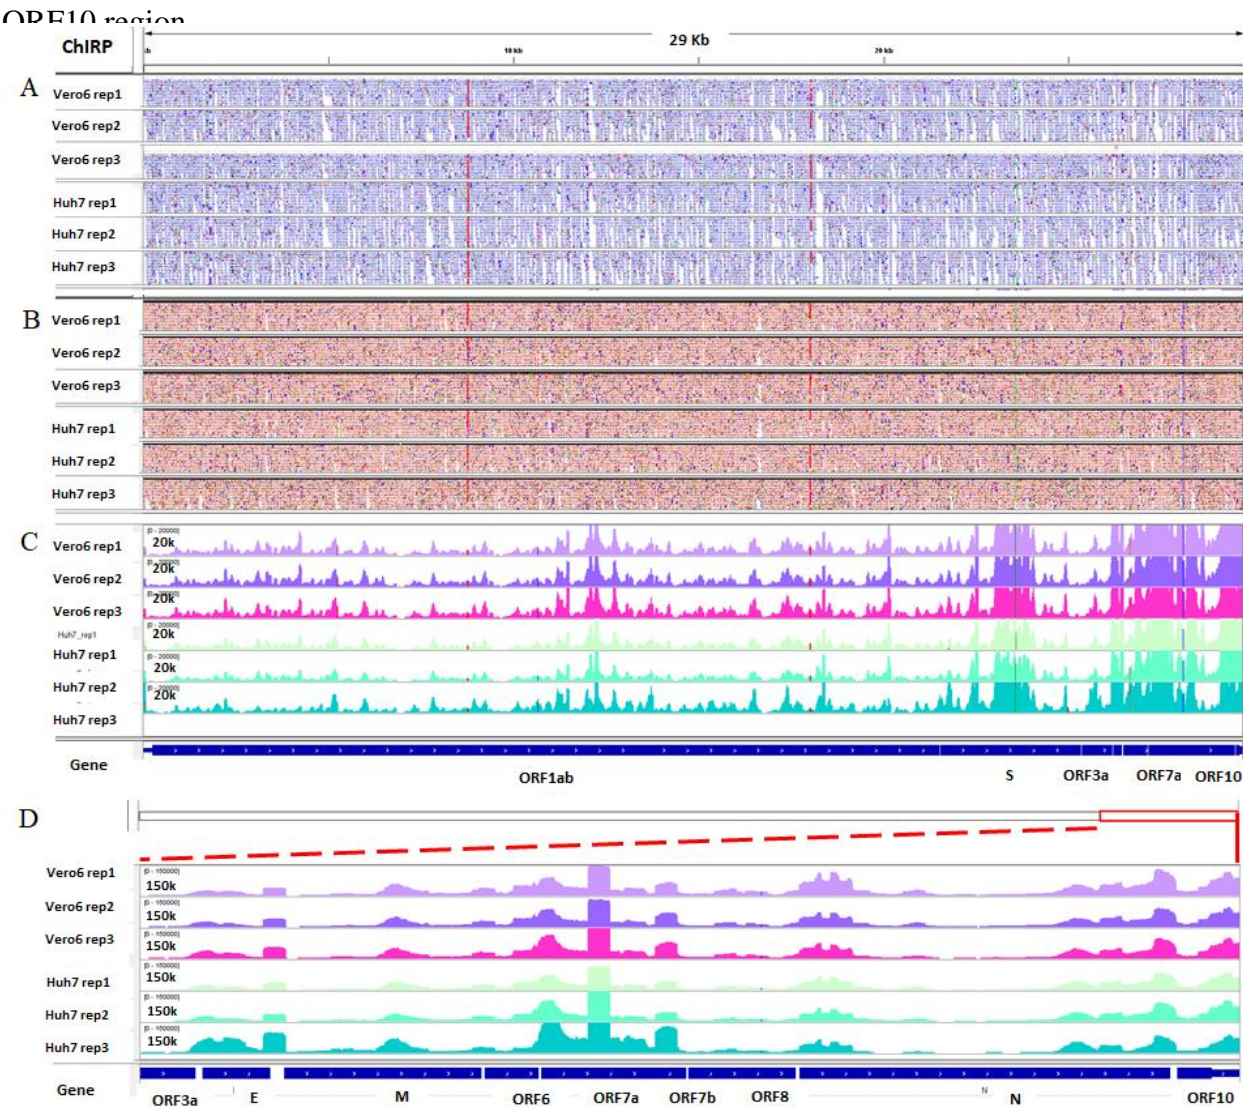

**Figure S3. IGV view, predicted tertiary structure, and sequence isoforms of vsmRNA-N1-5p, -N3-5p, and -ORF10-3p.**

vsmRNAs were choose from datasets of SARS-CoV-2-infected HEK293T-hACE2, BO-WT-CoV, Calu3-EW. vsmRNA-N1-5p (AGA AGG GAG CAG AGG CGG CAG U), located at NC-045512.2:28,792-28,813(+); vsmRNA-N3-5p (ACC GCA GAG ACA GAA GAA ACA GC), located at NC-045512.2:29,419-29441; and vsmRNA-ORF10-3p (AAC AAT GCT AGG GAG AGC TGC C), located at NC-045512.2:29,767-29,788

(A) Reads coverage for vsmRNA-N1,-N3, and -ORF10 on the genome of SARS-CoV-2. Mild-CoV: mild cases of COVID-19 patients; Severe-CoV: severe cases of COVID-19 patients; 293T-CoV: SARS-CoV-2 infected HEK293T-hACE2 cells; BO-aviD-CoV: Dicer knock out BO cells overexpressing aviD; BO-WT-CoV: Wild type BO cells overexpressing both endogenous Dicer and aviD; Calu3-CoV: SARS-CoV-2 infection of Calu-3 cells (Calu3-EW).

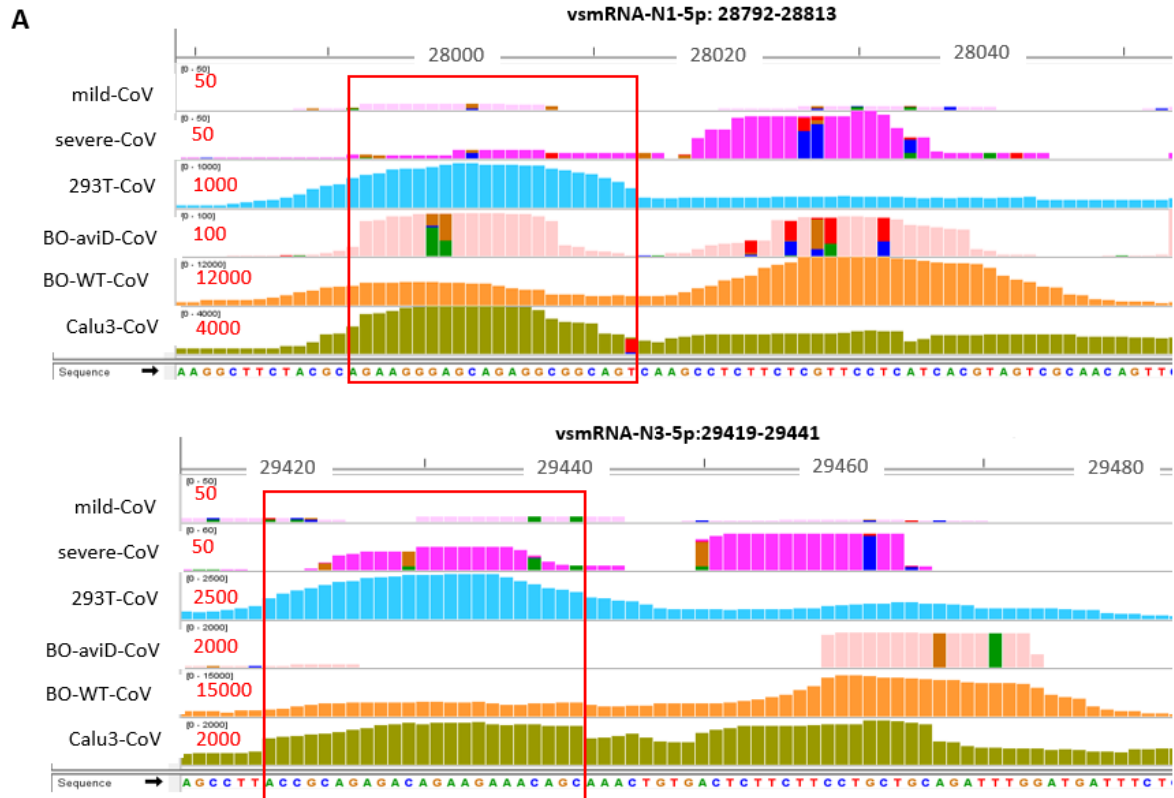

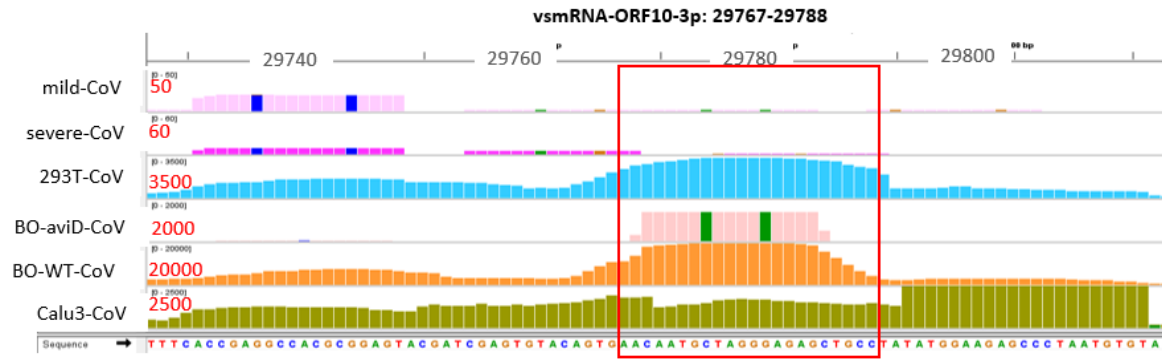

(B) LinearFold and mFold predicted tertiary structure of N-ORF10-3' UTR, vsmRNA-N1-5p, -N3-5p, and -ORF10-3p.

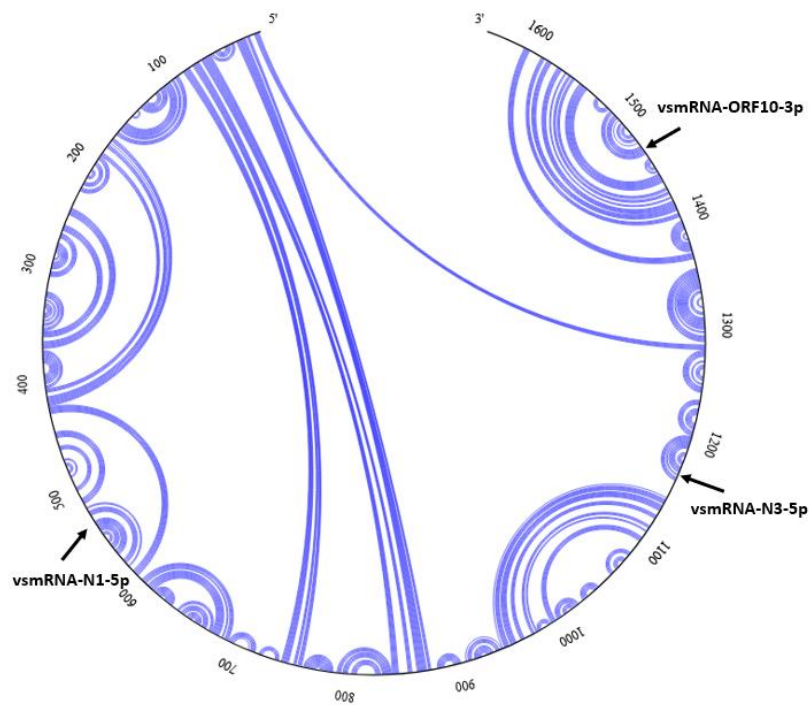

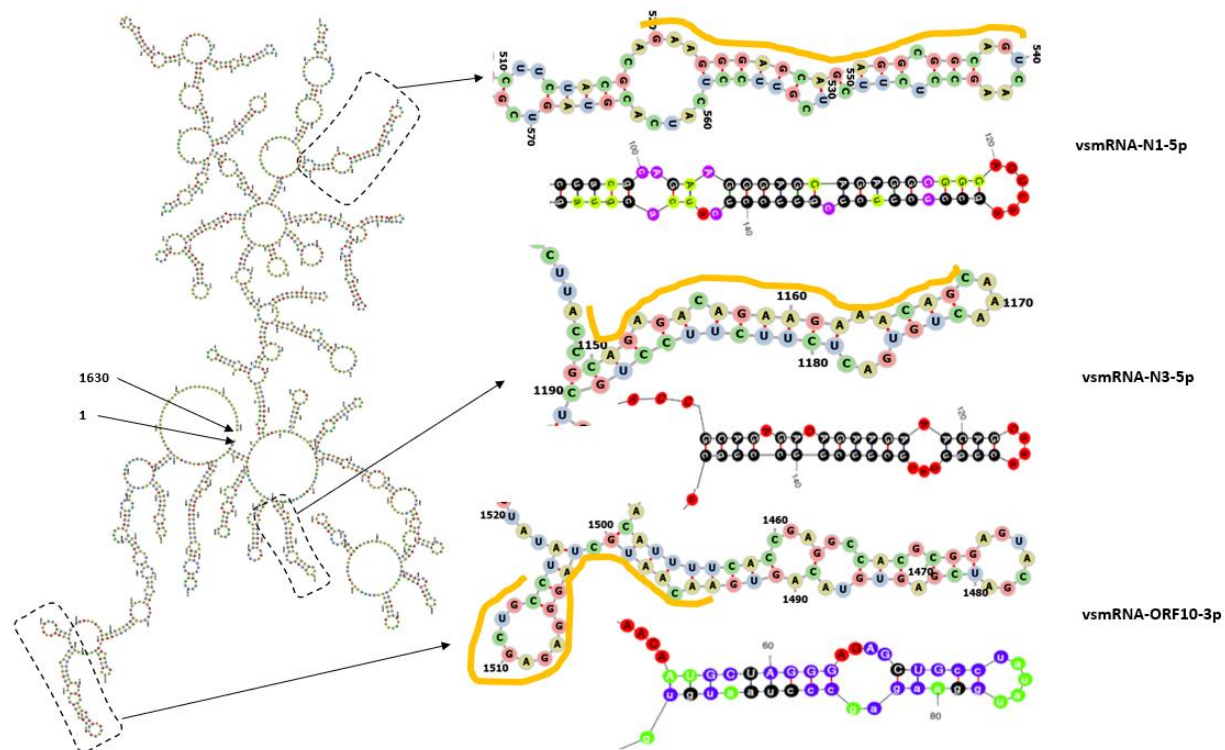

(C) Major sequence isoforms of vsmRNA-N1-5p, -N3-5p, and -ORF10-3p. Total: total reads count of top expressed isoforms. Rest: total reads count of other isoforms excluding the top expressed isoforms.

| vsmRNA | Sequence                      | Reads # nts |    | %     |
|--------|-------------------------------|-------------|----|-------|
| N1     | CGCAGAAGGGAGCAGAGGCGGCAGT     | 45          | 25 | 7.61  |
|        | AGGGAGCAGAGGCGGCAGT           | 31          | 19 | 5.25  |
|        | AAGGGAGCAGAGGCGGCAGT          | 22          | 20 | 3.72  |
|        | CTACGCAGAAGGGAGCAGAGGCGGCAGT  | 18          | 28 | 3.05  |
|        | GAAGGGAGCAGAGGCGGCAG          | 16          | 20 | 2.71  |
|        | AGAAGGGAGCAGAGGCGGCAGT        | 15          | 22 | 2.54  |
|        | GAAGGGAGCAGAGGCGGCAG          | 15          | 19 | 2.54  |
|        | GAAGGGAGCAGAGGCGGCAGT         | 15          | 21 | 2.54  |
|        | ACGCAGAAGGGAGCAGAGGCGGCAG     | 14          | 24 | 2.37  |
|        | AGAAGGGAGCAGAGGCGGCAG         | 14          | 21 | 2.37  |
|        | Total                         | 205         |    | 34.69 |
|        | Rest                          | 386         |    | 65.31 |
| N3     | ACCGCAGAGACAGAAGAAACAGCAAAC   | 56          | 28 | 3.26  |
|        | ACCGCAGAGACAGAAGAA            | 49          | 18 | 2.85  |
|        | CCGCAGAGACAGAAGAA             | 48          | 17 | 2.79  |
|        | ACCGCAGAGACAGAAGAAAC          | 46          | 20 | 2.68  |
|        | CCGCAGAGACAGAAGAAAC           | 40          | 19 | 2.33  |
|        | CCGCAGAGACAGAAGAAA            | 34          | 18 | 1.98  |
|        | ACCGCAGAGACAGAAGAAACAGCAAAC   | 33          | 27 | 1.92  |
|        | CCGCAGAGACAGAAGA              | 32          | 16 | 1.86  |
|        | AGAGACAGAAGAAACAGC            | 31          | 18 | 1.80  |
|        | GCAGAGACAGAAGAAACAGC          | 31          | 20 | 1.80  |
|        | Total                         | 400         |    | 23.28 |
|        | Rest                          | 1318        |    | 76.72 |
| ORF10  | GAACAATGCTAGGGAGAGCTGCCT      | 223         | 24 | 8.22  |
|        | ACAATGCTAGGGAGAGCTGCCT        | 135         | 22 | 4.97  |
|        | GTGAACAATGCTAGGGAGAGCTGCCT    | 116         | 26 | 4.27  |
|        | TGAACAATGCTAGGGAGAGCTGCCT     | 116         | 25 | 4.27  |
|        | AATGCTAGGGAGAGCTGCCT          | 84          | 20 | 3.10  |
|        | AGTGAACAATGCTAGGGAGAGCT       | 84          | 23 | 3.10  |
|        | ACAGTGAACAATGCTAGGGAGAGCTGCCT | 80          | 29 | 2.95  |
|        | AACAATGCTAGGGAGAGCTGCCT       | 78          | 23 | 2.87  |
|        | ACAATGCTAGGGAGAGCTGCC         | 68          | 21 | 2.51  |
|        | AGTGAACAATGCTAGGGAGAGCTGCC    | 67          | 26 | 2.47  |
|        | Total                         | 1051        |    | 38.73 |
|        | Rest                          | 1663        |    | 61.27 |

(D) siCheck reporters, plasmid and *in vitro* transcription produced transcripts of N-ORF10-3'UTR. siC-N: siCheck reporter carrying the N-ORF10-3'UTR sequence; siC-revN: siCheck reporter carrying the antisense sequence of N-ORF10-3'UTR; siC-N1-5p and 3p: siCheck reporters carrying both antisense or sense sequences of vsmRNA-N1, respectively; siC-N3-5p and 3p: siCheck reporters carrying both antisense or sense sequences of vsmRNA-N3,

respectively; siC-ORF10-5p and 3p: siCheck reporters carrying both antisense or sense sequences of vsmRNA-ORF10, respectively; pMD2-N: plasmid carrying CMV promoter-driven N-ORF10-3'UTR sequence; ivt-N: T7 *in vitro* transcription produced N-ORF10-3'UTR; ivt-5'N: *in vitro* transcription produced 5' half of N-ORF10-3'UTR; ivt-3'N: *in vitro* transcription produced 3' half of N-ORF10-3'UTR.

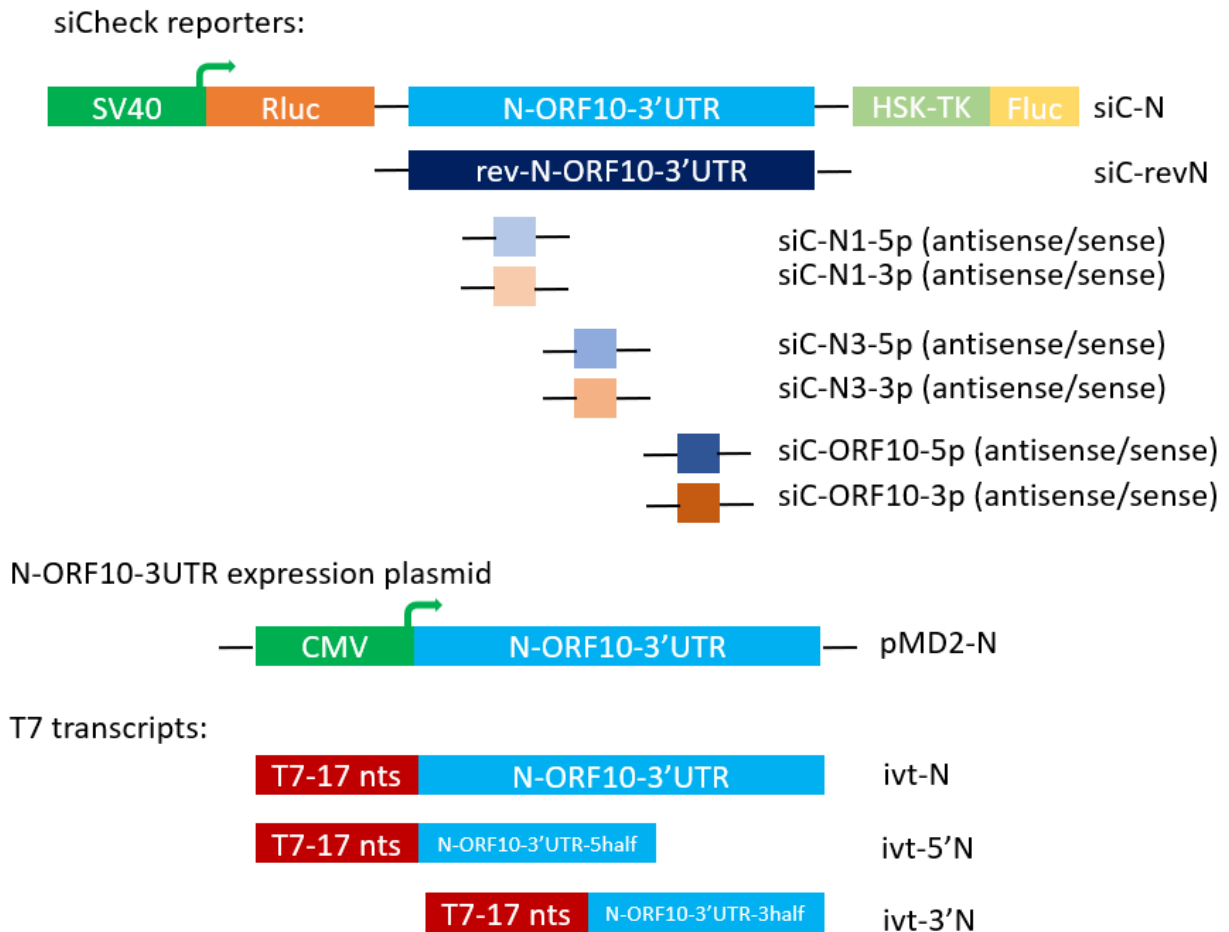

(E) siCheck reporter assay of silencing of siC-N and siC-revN by N-ORF10-3'UTR plasmid or T7 transcripts (ivt).

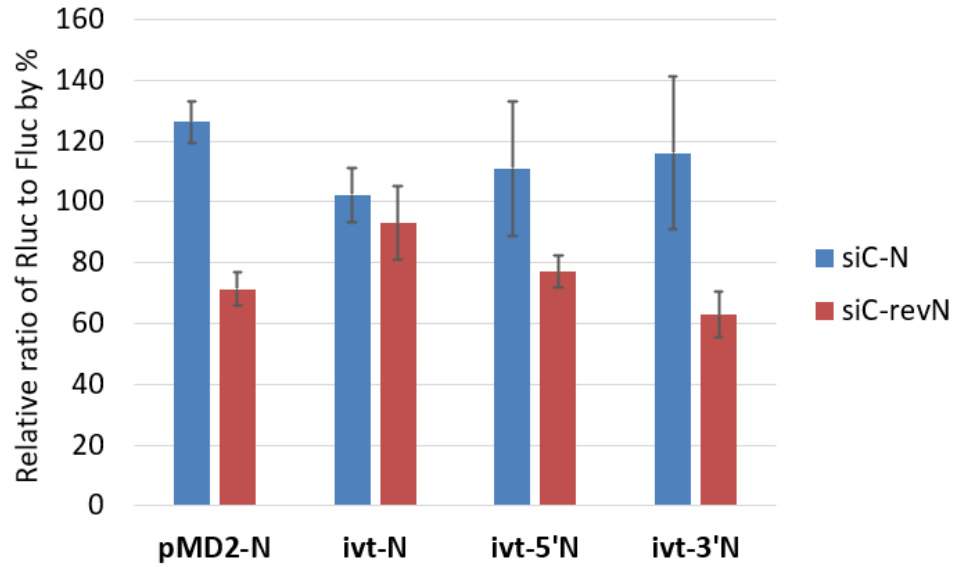

(F) siCheck reporter assay of silencing of 5p and 3p reporters of vsmRNA-N1,-N3, and ORF10 by N-ORF10-3'UTR plasmid or T7 transcripts (ivt).

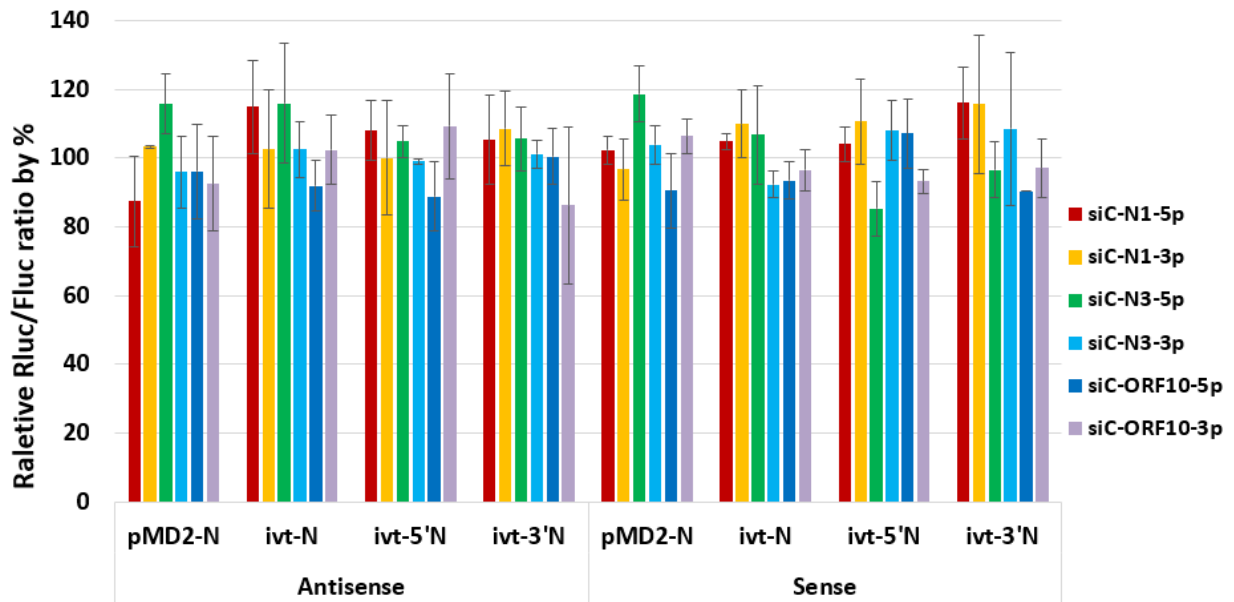

**Figure S4. Comparative IGV view of reads from smRNAseq of HEK293T-hACE2 and mouse brain organoids mapped to the SARS-CoV-2 genome. (A) Reads mapped to the full-length negative genome of SARS-CoV-2; (B) Reads mapped to the full-length positive genome of SARS-CoV-2; (C) Reads coverage on full-length SARS-CoV-2 genome.**

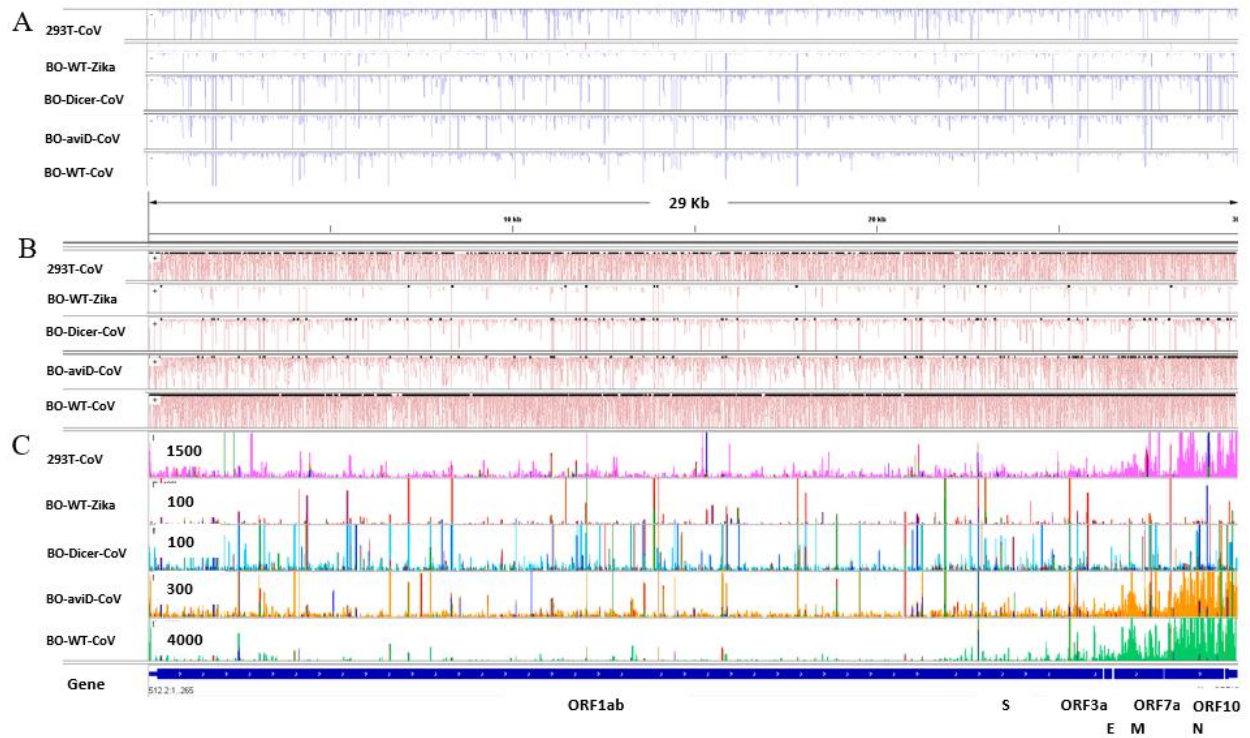

**Figure S5. Comparative IGV view of reads from smRNAseq datasets of GC and JS.** (A) Reads mapped to the full-length negative genome of SARS-CoV-2; (B) Reads mapped to the full-length positive genome of SARS-CoV-2; (C) Reads coverage on full-length SARS-CoV-2 genome.

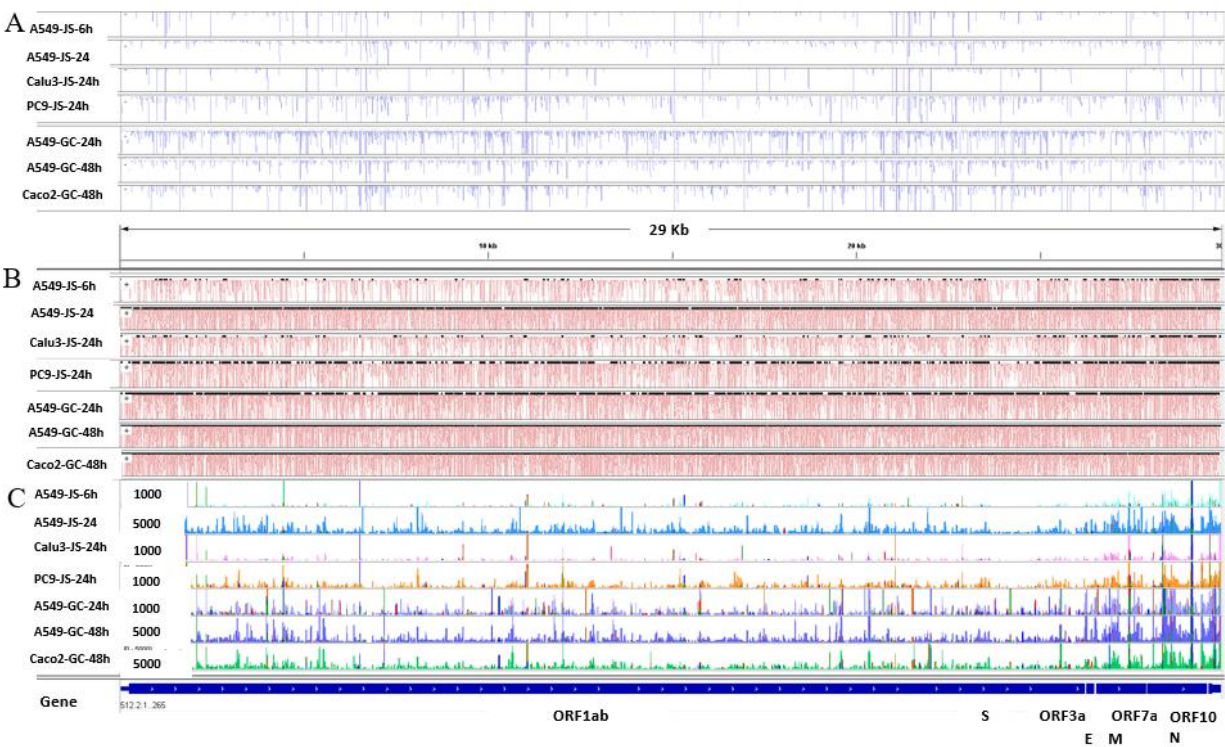

**Figure S6. IGV view of human miRNAs in SARS-CoV-2 infected HEK293T-hACE2 cells and A549-hACE2 cells.** Reads distribution and coverage for human miRNAs in SARS-CoV-2 infected HEK293T-hACE2 at 72hpi (HEK293T\_72h), A549-hACE2 at 24hpi (A549\_JS\_24h), and A549-hACE2 at 48hpi (A549\_GC\_48h). (A) miR-17 cluster: miR-17, miR-18A, miR-19A, miR-20A, miR-19B-1, and miR-92A-1; (B) miR-17-5p and miR-18a-5p; (C) miR-19a-3p and miR-20a-5p; (D) miR-19b-3p and miR-92a-3p; (E) miR-7-5p and miR-29b-3p.

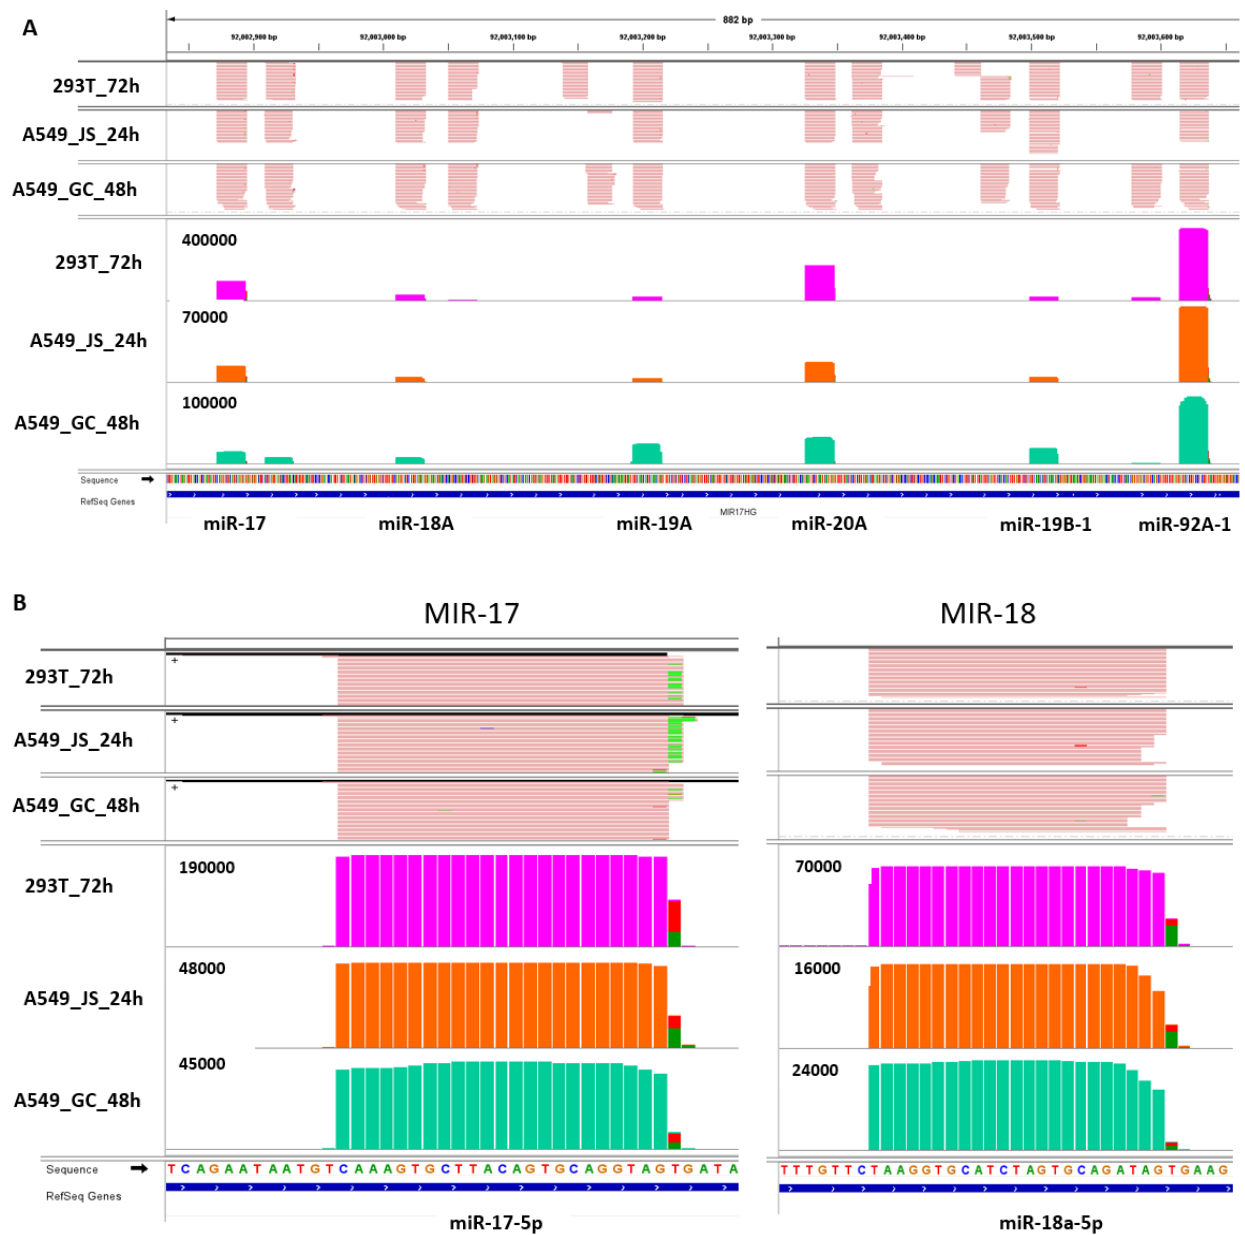

C

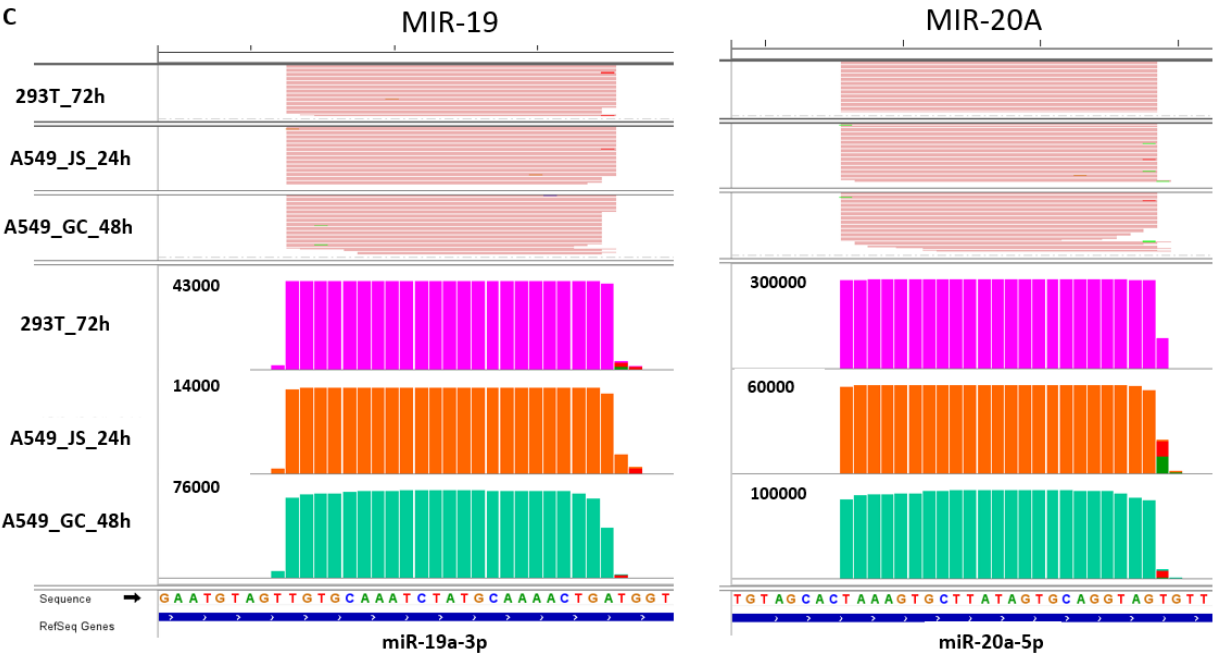

D

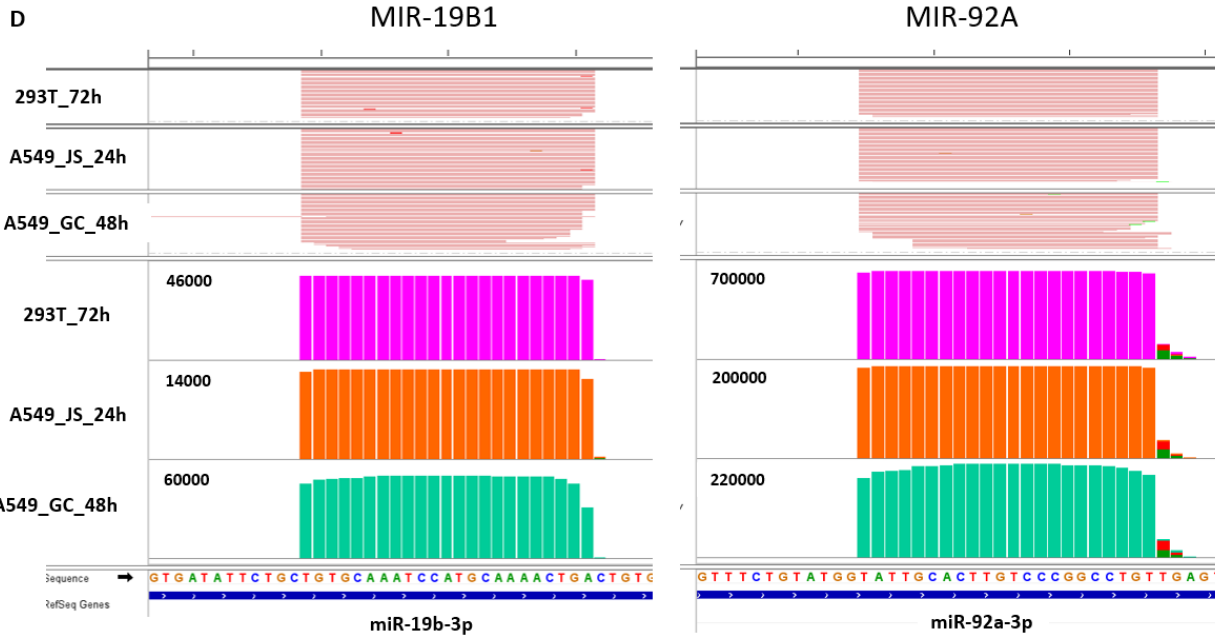

E

## MIR-7-2

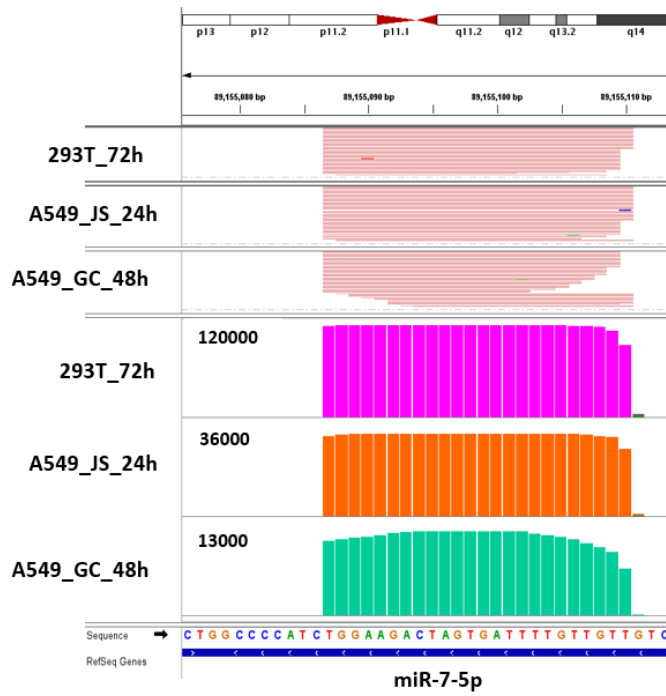

## MIR-29B-1

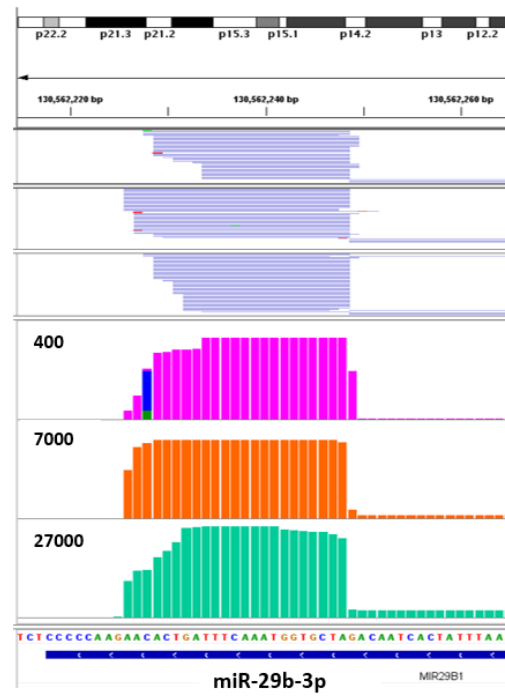



## 2. Supplementary tables

**Table S1.** Oligos used in the study.

| Name              | Sequence (5' to 3')                                            | Note          |
|-------------------|----------------------------------------------------------------|---------------|
| Rev-polyT         | CAGTGCAGGGTCCGAGGT                                             | smRNA qRT-PCR |
| f-210-3p          | CTGTGCGTGTGACAGCG                                              |               |
| rt-210-3p         | CAGTGCAGGGTCCGAGGTGACAGCCACCTGGGCAATTTTTTTTTTTTTCAGCC          |               |
| f-222-3p          | AGCTACATCTGGCTACTGGG                                           |               |
| rt-222-3p1        | CAGTGCAGGGTCCGAGGTGACAGCCACCTGGGCAATTTTTTTTTTTTAGACCC          |               |
| rt-222-3p2        | CAGTGCAGGGTCCGAGGTGACAGCCACCTGGGCAATTTTTTTTTTTGAGACC           |               |
| rt-222-3p3        | CAGTGCAGGGTCCGAGGTGACAGCCACCTGGGCAATTTTTTTTTTTAGAGAC           |               |
| f-30d-5p          | TGTAAACATCCCGACTGGAAG                                          |               |
| rt-30d-5p1        | CAGTGCAGGGTCCGAGGTGACAGCCACCTGGGCAATTTTTTTTTTTGCTTCC           |               |
| rt-30d-5p2        | CAGTGCAGGGTCCGAGGTGACAGCCACCTGGGCAATTTTTTTTTTTAGCTTC           |               |
| f-874-3p          | CTGCCCTGGCCCGAGGGA                                             |               |
| rt-874-3p1        | CAGTGCAGGGTCCGAGGTGACAGCCACCTGGGCAATTTTTTTTTTTGTCCGT           |               |
| rt-874-3p2        | CAGTGCAGGGTCCGAGGTGACAGCCACCTGGGCAATTTTTTTTTTTAGTCGG           |               |
| f-Asp-GTC-2-8     | CGCGGGAGACCGGGGTTTC                                            |               |
| rt-Asp-GTC-2-8    | CAGTGCAGGGTCCGAGGTGACAGCCACCTGGGCAATTTTTTTTTTTTGGCTC           |               |
| f-Glu-CTC-1-6     | agTGGTTAGGATTCGGCGC                                            |               |
| rt-Glu-CTC-1-6    | CAGTGCAGGGTCCGAGGTGACAGCCACCTGGGCAATTTTTTTTTTTGCGCGC           |               |
| f-Glu-CTC-2-1     | TCCCTGGTGGTCTAGTGGT                                            |               |
| rt-Glu-CTC-2-1-p1 | CAGTGCAGGGTCCGAGGTGACAGCCACCTGGGCAATTTTTTTTTTTATCCTA           |               |
| rt-Glu-CTC-2-1-p2 | CAGTGCAGGGTCCGAGGTGACAGCCACCTGGGCAATTTTTTTTTTTGAGAGC           |               |
| f-hY4             | GGCTGGTCCGATGGTAGT                                             |               |
| rt-hY4-p1         | CAGTGCAGGGTCCGAGGTGACAGCCACCTGGGCAATTTTTTTTTTTGTCTG            |               |
| rt-hY4-p2         | CAGTGCAGGGTCCGAGGTGACAGCCACCTGGGCAATTTTTTTTTTTAGTTCT           |               |
| rt-hY4-p3         | CAGTGCAGGGTCCGAGGTGACAGCCACCTGGGCAATTTTTTTTTTTAAGTTC           |               |
| f-10a-5p          | gatccTACCCTGTAGATCCGAATT                                       |               |
| rt-10a-5p         | CAGTGCAGGGTCCGAGGTGACAGCCACCTGGGCAATTTTTTTTTTTAATTCG           |               |
| f-484             | TCAGGCTCAGTCCCCTCC                                             |               |
| rt-484-p1         | CAGTGCAGGGTCCGAGGTGACAGCCACCTGGGCAATTTTTTTTTTTGGGAGG           |               |
| rt-484-p2         | CAGTGCAGGGTCCGAGGTGACAGCCACCTGGGCAATTTTTTTTTTTATCGGG           |               |
| 5N28791-5p        | tcgaGAACGAGAAGAGGCTTGACTGCCGCCTCTGCTCCCTTCTGCGTAGAAGCCTTTTGG   | siC-N1-5p     |
| 3N28791-5p        | ctagccaaaagccttctacgcAGAAGGAGCAGAGGCGGCAGTcaagcctctctcgttc     | siC-N1-3p     |
| 5N28791-3p        | tcgaGGAGTTGAATTTCTTGAAGTGTGCGACTACGTGATGAGGAACGAGAAGAGGCTTG    |               |
| 3N28791-3p        | ctagcaagcctcttctcgttctctcatcacgtagtcgcaacagttcaagaaattcaactcc  | siC-N3-5p     |
| 5N29419-5p        | tcgaAGAAGAGTCACAGTTTGCTGTTTCTTCTGTCTCTGCGGTAAGGCTTGAGTTTCATC   |               |
| 3N29419-5p        | ctaggatgaaaactcaagccttACCAGCAGAGACAGAAGAAACAGCaaactgtgactcttct | siC-N3-3p     |
| 5N29419-3p        | tcgaTTGCAATTGTTTGGAGAAATCATCCAAATCTGCAGCAGGAAGAAGAGTCACAGTTT   |               |
| 3N29419-3p        | ctagaaaactgtgactcttcttctcgtgctgcagatttgatgatttctccaaacaattgcaa | siC-ORF10-5p  |
| 5ORF10-29767-5p   | tcgaTAGGGCTCTTCCATATAGGCAGCTCTCCCTAGCATTGTTCACTGTACACTCGATCG   |               |
| 3ORF10-29767-5p   | ctagcgatcgagtgtacagtgAACAAATGCTAGGGAGAGCTGCCtatatggaagagcccta  | siC-ORF10-3p  |
| 5ORF10-29767-3p   | tcgaTCACATGGGGATAGCACTACTAAATTAATTTTACACATTAGGGCTCTTCCATATA    |               |
| 3ORF10-29767-3p   | ctagtatatggaagagccctaagtgtgtaaaattaatttttagtagtgctatccccatgtga |               |

### 3. Supplementary data files

File\_S1A\_ HEK293T-hACE2-smRNAseq\_miRNA and tRFs read count and DESeq2 results infected vs uninfected\_miRge3.xlsx

File\_S1B\_ HEK293T-hACE2-smRNAseq\_miRNA read count and DESeq2 results infected vs uninfected\_miRge3.xlsx

File\_S1C\_ HEK293T-hACE2-smRNAseq\_miRNA read count and DESeq2 results infected vs uninfected\_miRge2.xlsx

File\_S2A\_ raw miRNA read count\_Calu3\_EW-Plasma-II of h-m-s-COVID-19.xlsx

File\_S2B\_ HEK293T vs GC JS datasets-DESeq2 results of log2FC-p-adj-baseMean.xlsx

File\_S3A\_miRDB predicted miRNAs targeting the SARS-CoV-2 -- list and rank.docx

File\_S3B\_miRDB predicted host miRNA seed on SARS-CoV-2 genome.docx

File\_S4\_normalized read count of human miRNAs from the second plasma dataset of COVID-19 patients.xlsx

File\_S5\_Filtered HEK293T miRNA count.xlsx contains miRge analyzed original raw miRNA counts in HEK293T-hACE2 cells.xlsx

File\_S6\_GC and JS datasets- DESeq2 results infected vs uninfected.xlsx
