# Supplementary material for: Viral and Host Small RNA Response to SARS-CoV-2 Infection
Source: MDPI journal article supplement (doi:10.3390/microbiolres13040056), 2022-10-10
Supplement: s1 [file s1]

There are 900 predicted miRNAs targeting the SARS-CoV-2 (Wuhan) mRNA sequence

| Rank | Score | miRNA Name                        |
|------|-------|-----------------------------------|
| 1    | 99    | <a href="#">hsa-miR-4288</a>      |
| 2    | 99    | <a href="#">hsa-miR-195-5p</a>    |
| 3    | 99    | <a href="#">hsa-miR-16-5p</a>     |
| 4    | 99    | <a href="#">hsa-miR-15b-5p</a>    |
| 5    | 99    | <a href="#">hsa-miR-15a-5p</a>    |
| 6    | 99    | <a href="#">hsa-miR-6838-5p</a>   |
| 7    | 98    | <a href="#">hsa-miR-497-5p</a>    |
| 8    | 98    | <a href="#">hsa-miR-424-5p</a>    |
| 9    | 98    | <a href="#">hsa-miR-3133</a>      |
| 10   | 98    | <a href="#">hsa-miR-21-3p</a>     |
| 11   | 97    | <a href="#">hsa-miR-122b-3p</a>   |
| 12   | 97    | <a href="#">hsa-miR-559</a>       |
| 13   | 97    | <a href="#">hsa-miR-196a-1-3p</a> |
| 14   | 97    | <a href="#">hsa-miR-548y</a>      |
| 15   | 97    | <a href="#">hsa-miR-548w</a>      |
| 16   | 97    | <a href="#">hsa-miR-548o-5p</a>   |
| 17   | 97    | <a href="#">hsa-miR-548h-5p</a>   |
| 18   | 97    | <a href="#">hsa-miR-548d-5p</a>   |
| 19   | 97    | <a href="#">hsa-miR-548c-5p</a>   |
| 20   | 97    | <a href="#">hsa-miR-548bb-5p</a>  |
| 21   | 97    | <a href="#">hsa-miR-548b-5p</a>   |
| 22   | 97    | <a href="#">hsa-miR-548ay-5p</a>  |
| 23   | 97    | <a href="#">hsa-miR-548au-5p</a>  |
| 24   | 97    | <a href="#">hsa-miR-548ar-5p</a>  |
| 25   | 97    | <a href="#">hsa-miR-548am-5p</a>  |
| 26   | 97    | <a href="#">hsa-miR-548ak</a>     |
| 27   | 97    | <a href="#">hsa-miR-548ae-5p</a>  |
| 28   | 97    | <a href="#">hsa-miR-548ad-5p</a>  |
| 29   | 97    | <a href="#">hsa-miR-548aq-5p</a>  |
| 30   | 97    | <a href="#">hsa-miR-302c-5p</a>   |
| 31   | 96    | <a href="#">hsa-miR-548a-5p</a>   |
| 32   | 96    | <a href="#">hsa-miR-548as-5p</a>  |
| 33   | 96    | <a href="#">hsa-miR-548ab</a>     |
| 34   | 96    | <a href="#">hsa-miR-4684-3p</a>   |
| 35   | 96    | <a href="#">hsa-miR-409-3p</a>    |
| 36   | 96    | <a href="#">hsa-miR-548j-5p</a>   |
| 37   | 96    | <a href="#">hsa-miR-548i</a>      |
| 38   | 96    | <a href="#">hsa-miR-548ap-5p</a>  |
| 39   | 95    | <a href="#">hsa-miR-186-5p</a>    |
| 40   | 95    | <a href="#">hsa-miR-545-3p</a>    |

|    |    |                                  |
|----|----|----------------------------------|
| 41 | 95 | <a href="#">hsa-miR-6835-3p</a>  |
| 42 | 95 | <a href="#">hsa-miR-30c-5p</a>   |
| 43 | 95 | <a href="#">hsa-miR-30b-5p</a>   |
| 44 | 95 | <a href="#">hsa-miR-6830-3p</a>  |
| 45 | 95 | <a href="#">hsa-miR-30e-5p</a>   |
| 46 | 95 | <a href="#">hsa-miR-30d-5p</a>   |
| 47 | 95 | <a href="#">hsa-miR-30a-5p</a>   |
| 48 | 95 | <a href="#">hsa-miR-3686</a>     |
| 49 | 95 | <a href="#">hsa-miR-505-3p</a>   |
| 50 | 94 | <a href="#">hsa-miR-632</a>      |
| 51 | 94 | <a href="#">hsa-miR-548z</a>     |
| 52 | 94 | <a href="#">hsa-miR-548h-3p</a>  |
| 53 | 94 | <a href="#">hsa-miR-548d-3p</a>  |
| 54 | 94 | <a href="#">hsa-miR-548bb-3p</a> |
| 55 | 94 | <a href="#">hsa-miR-548ac</a>    |
| 56 | 93 | <a href="#">hsa-miR-548m</a>     |
| 57 | 93 | <a href="#">hsa-miR-374a-5p</a>  |
| 58 | 93 | <a href="#">hsa-miR-4778-3p</a>  |
| 59 | 93 | <a href="#">hsa-miR-4422</a>     |
| 60 | 93 | <a href="#">hsa-miR-4490</a>     |
| 61 | 93 | <a href="#">hsa-miR-527</a>      |
| 62 | 93 | <a href="#">hsa-miR-518a-5p</a>  |
| 63 | 93 | <a href="#">hsa-miR-5688</a>     |
| 64 | 93 | <a href="#">hsa-miR-548as-3p</a> |
| 65 | 92 | <a href="#">hsa-miR-7159-5p</a>  |
| 66 | 92 | <a href="#">hsa-miR-6512-5p</a>  |
| 67 | 92 | <a href="#">hsa-miR-29c-3p</a>   |
| 68 | 92 | <a href="#">hsa-miR-29b-3p</a>   |
| 69 | 92 | <a href="#">hsa-miR-633</a>      |
| 70 | 92 | <a href="#">hsa-miR-1226-3p</a>  |
| 71 | 92 | <a href="#">hsa-miR-4310</a>     |
| 72 | 92 | <a href="#">hsa-miR-495-3p</a>   |
| 73 | 91 | <a href="#">hsa-miR-374b-5p</a>  |
| 74 | 91 | <a href="#">hsa-miR-4775</a>     |
| 75 | 91 | <a href="#">hsa-miR-1283</a>     |
| 76 | 91 | <a href="#">hsa-miR-628-3p</a>   |
| 77 | 91 | <a href="#">hsa-miR-141-3p</a>   |
| 78 | 91 | <a href="#">hsa-miR-1305</a>     |
| 79 | 91 | <a href="#">hsa-miR-29a-3p</a>   |
| 80 | 90 | <a href="#">hsa-miR-653-5p</a>   |
| 81 | 90 | <a href="#">hsa-miR-4760-3p</a>  |
| 82 | 90 | <a href="#">hsa-miR-513b-3p</a>  |

|     |    |                                   |
|-----|----|-----------------------------------|
| 83  | 90 | <a href="#">hsa-miR-4524b-5p</a>  |
| 84  | 90 | <a href="#">hsa-miR-4524a-5p</a>  |
| 85  | 90 | <a href="#">hsa-miR-758-5p</a>    |
| 86  | 90 | <a href="#">hsa-miR-302e</a>      |
| 87  | 90 | <a href="#">hsa-miR-219a-1-3p</a> |
| 88  | 90 | <a href="#">hsa-miR-6869-5p</a>   |
| 89  | 90 | <a href="#">hsa-miR-200a-3p</a>   |
| 90  | 90 | <a href="#">hsa-miR-3065-3p</a>   |
| 91  | 90 | <a href="#">hsa-miR-194-5p</a>    |
| 92  | 89 | <a href="#">hsa-miR-1279</a>      |
| 93  | 89 | <a href="#">hsa-miR-4642</a>      |
| 94  | 89 | <a href="#">hsa-miR-3182</a>      |
| 95  | 89 | <a href="#">hsa-miR-3065-5p</a>   |
| 96  | 89 | <a href="#">hsa-miR-152-3p</a>    |
| 97  | 89 | <a href="#">hsa-miR-148b-3p</a>   |
| 98  | 89 | <a href="#">hsa-miR-148a-3p</a>   |
| 99  | 89 | <a href="#">hsa-miR-451b</a>      |
| 100 | 89 | <a href="#">hsa-miR-3120-3p</a>   |
| 101 | 89 | <a href="#">hsa-miR-510-3p</a>    |
| 102 | 89 | <a href="#">hsa-miR-548p</a>      |
| 103 | 89 | <a href="#">hsa-miR-6509-5p</a>   |
| 104 | 89 | <a href="#">hsa-miR-335-3p</a>    |
| 105 | 89 | <a href="#">hsa-miR-3613-5p</a>   |
| 106 | 89 | <a href="#">hsa-miR-330-3p</a>    |
| 107 | 88 | <a href="#">hsa-miR-6515-3p</a>   |
| 108 | 88 | <a href="#">hsa-miR-33a-3p</a>    |
| 109 | 88 | <a href="#">hsa-miR-3149</a>      |
| 110 | 88 | <a href="#">hsa-miR-3671</a>      |
| 111 | 88 | <a href="#">hsa-miR-298</a>       |
| 112 | 88 | <a href="#">hsa-miR-125b-2-3p</a> |
| 113 | 88 | <a href="#">hsa-miR-216b-3p</a>   |
| 114 | 88 | <a href="#">hsa-miR-3185</a>      |
| 115 | 88 | <a href="#">hsa-miR-6844</a>      |
| 116 | 88 | <a href="#">hsa-miR-3912-5p</a>   |
| 117 | 88 | <a href="#">hsa-miR-411-5p</a>    |
| 118 | 88 | <a href="#">hsa-miR-374a-3p</a>   |
| 119 | 87 | <a href="#">hsa-miR-8075</a>      |
| 120 | 87 | <a href="#">hsa-miR-4282</a>      |
| 121 | 87 | <a href="#">hsa-miR-4659b-3p</a>  |
| 122 | 87 | <a href="#">hsa-miR-4659a-3p</a>  |
| 123 | 87 | <a href="#">hsa-miR-4724-3p</a>   |
| 124 | 87 | <a href="#">hsa-miR-624-5p</a>    |
| 125 | 87 | <a href="#">hsa-miR-548aw</a>     |

|     |    |                                  |
|-----|----|----------------------------------|
| 126 | 87 | <a href="#">hsa-miR-497-3p</a>   |
| 127 | 87 | <a href="#">hsa-miR-375-3p</a>   |
| 128 | 87 | <a href="#">hsa-miR-3123</a>     |
| 129 | 87 | <a href="#">hsa-miR-548l</a>     |
| 130 | 86 | <a href="#">hsa-miR-4742-3p</a>  |
| 131 | 86 | <a href="#">hsa-miR-4262</a>     |
| 132 | 86 | <a href="#">hsa-miR-2052</a>     |
| 133 | 86 | <a href="#">hsa-miR-4504</a>     |
| 134 | 86 | <a href="#">hsa-miR-603</a>      |
| 135 | 86 | <a href="#">hsa-miR-493-5p</a>   |
| 136 | 86 | <a href="#">hsa-miR-222-5p</a>   |
| 137 | 86 | <a href="#">hsa-miR-802</a>      |
| 138 | 86 | <a href="#">hsa-miR-582-3p</a>   |
| 139 | 86 | <a href="#">hsa-miR-6124</a>     |
| 140 | 86 | <a href="#">hsa-miR-412-3p</a>   |
| 141 | 86 | <a href="#">hsa-miR-8054</a>     |
| 142 | 86 | <a href="#">hsa-miR-548k</a>     |
| 143 | 86 | <a href="#">hsa-miR-548av-5p</a> |
| 144 | 86 | <a href="#">hsa-miR-548j-3p</a>  |
| 145 | 86 | <a href="#">hsa-miR-5003-5p</a>  |
| 146 | 85 | <a href="#">hsa-miR-676-5p</a>   |
| 147 | 85 | <a href="#">hsa-miR-570-5p</a>   |
| 148 | 85 | <a href="#">hsa-miR-548ba</a>    |
| 149 | 85 | <a href="#">hsa-miR-548ai</a>    |
| 150 | 85 | <a href="#">hsa-miR-548ag</a>    |
| 151 | 85 | <a href="#">hsa-miR-4527</a>     |
| 152 | 85 | <a href="#">hsa-miR-675-3p</a>   |
| 153 | 85 | <a href="#">hsa-miR-5684</a>     |
| 154 | 85 | <a href="#">hsa-miR-548t-3p</a>  |
| 155 | 85 | <a href="#">hsa-miR-548ap-3p</a> |
| 156 | 85 | <a href="#">hsa-miR-548aa</a>    |
| 157 | 85 | <a href="#">hsa-miR-3692-3p</a>  |
| 158 | 85 | <a href="#">hsa-miR-4753-3p</a>  |
| 159 | 85 | <a href="#">hsa-miR-585-5p</a>   |
| 160 | 85 | <a href="#">hsa-miR-107</a>      |
| 161 | 85 | <a href="#">hsa-miR-103a-3p</a>  |
| 162 | 84 | <a href="#">hsa-miR-4766-3p</a>  |
| 163 | 84 | <a href="#">hsa-miR-6754-3p</a>  |
| 164 | 84 | <a href="#">hsa-miR-664b-3p</a>  |
| 165 | 84 | <a href="#">hsa-miR-579-3p</a>   |
| 166 | 84 | <a href="#">hsa-miR-548t-5p</a>  |
| 167 | 84 | <a href="#">hsa-miR-548az-5p</a> |
| 168 | 84 | <a href="#">hsa-miR-3159</a>     |

|     |    |                                  |
|-----|----|----------------------------------|
| 169 | 84 | <a href="#">hsa-miR-4778-5p</a>  |
| 170 | 84 | <a href="#">hsa-miR-449b-3p</a>  |
| 171 | 84 | <a href="#">hsa-miR-4501</a>     |
| 172 | 84 | <a href="#">hsa-miR-7978</a>     |
| 173 | 84 | <a href="#">hsa-miR-548n</a>     |
| 174 | 84 | <a href="#">hsa-miR-548aq-3p</a> |
| 175 | 84 | <a href="#">hsa-miR-548am-3p</a> |
| 176 | 84 | <a href="#">hsa-miR-548ah-3p</a> |
| 177 | 84 | <a href="#">hsa-miR-548ae-3p</a> |
| 178 | 84 | <a href="#">hsa-miR-548g-3p</a>  |
| 179 | 83 | <a href="#">hsa-miR-6503-5p</a>  |
| 180 | 83 | <a href="#">hsa-miR-5682</a>     |
| 181 | 83 | <a href="#">hsa-miR-548x-5p</a>  |
| 182 | 83 | <a href="#">hsa-miR-548g-5p</a>  |
| 183 | 83 | <a href="#">hsa-miR-548aj-5p</a> |
| 184 | 83 | <a href="#">hsa-miR-101-3p</a>   |
| 185 | 83 | <a href="#">hsa-miR-7157-5p</a>  |
| 186 | 83 | <a href="#">hsa-miR-4452</a>     |
| 187 | 83 | <a href="#">hsa-miR-139-5p</a>   |
| 188 | 83 | <a href="#">hsa-miR-4744</a>     |
| 189 | 83 | <a href="#">hsa-miR-2054</a>     |
| 190 | 83 | <a href="#">hsa-miR-4703-5p</a>  |
| 191 | 83 | <a href="#">hsa-miR-3925-5p</a>  |
| 192 | 83 | <a href="#">hsa-miR-513c-3p</a>  |
| 193 | 83 | <a href="#">hsa-miR-513a-3p</a>  |
| 194 | 83 | <a href="#">hsa-miR-4717-3p</a>  |
| 195 | 83 | <a href="#">hsa-miR-4735-5p</a>  |
| 196 | 82 | <a href="#">hsa-miR-3674</a>     |
| 197 | 82 | <a href="#">hsa-miR-1256</a>     |
| 198 | 82 | <a href="#">hsa-miR-142-5p</a>   |
| 199 | 82 | <a href="#">hsa-miR-6800-5p</a>  |
| 200 | 82 | <a href="#">hsa-miR-577</a>      |
| 201 | 82 | <a href="#">hsa-miR-548x-3p</a>  |
| 202 | 82 | <a href="#">hsa-miR-548aj-3p</a> |
| 203 | 82 | <a href="#">hsa-miR-605-5p</a>   |
| 204 | 82 | <a href="#">hsa-miR-503-5p</a>   |
| 205 | 82 | <a href="#">hsa-miR-936</a>      |
| 206 | 82 | <a href="#">hsa-miR-5590-3p</a>  |
| 207 | 82 | <a href="#">hsa-miR-153-3p</a>   |
| 208 | 82 | <a href="#">hsa-miR-5696</a>     |
| 209 | 82 | <a href="#">hsa-miR-552-5p</a>   |
| 210 | 82 | <a href="#">hsa-miR-197-3p</a>   |
| 211 | 82 | <a href="#">hsa-miR-6805-3p</a>  |

|     |    |                                  |
|-----|----|----------------------------------|
| 212 | 82 | <a href="#">hsa-miR-5691</a>     |
| 213 | 81 | <a href="#">hsa-miR-548e-5p</a>  |
| 214 | 81 | <a href="#">hsa-miR-548f-5p</a>  |
| 215 | 81 | <a href="#">hsa-miR-6875-3p</a>  |
| 216 | 81 | <a href="#">hsa-miR-584-3p</a>   |
| 217 | 81 | <a href="#">hsa-miR-485-3p</a>   |
| 218 | 81 | <a href="#">hsa-miR-103b</a>     |
| 219 | 81 | <a href="#">hsa-miR-6866-5p</a>  |
| 220 | 81 | <a href="#">hsa-miR-7851-3p</a>  |
| 221 | 81 | <a href="#">hsa-miR-4528</a>     |
| 222 | 81 | <a href="#">hsa-miR-539-3p</a>   |
| 223 | 81 | <a href="#">hsa-miR-8063</a>     |
| 224 | 81 | <a href="#">hsa-miR-885-5p</a>   |
| 225 | 81 | <a href="#">hsa-miR-634</a>      |
| 226 | 81 | <a href="#">hsa-miR-4677-3p</a>  |
| 227 | 81 | <a href="#">hsa-miR-183-3p</a>   |
| 228 | 81 | <a href="#">hsa-miR-5195-3p</a>  |
| 229 | 81 | <a href="#">hsa-miR-145-5p</a>   |
| 230 | 81 | <a href="#">hsa-miR-624-3p</a>   |
| 231 | 81 | <a href="#">hsa-miR-548at-5p</a> |
| 232 | 81 | <a href="#">hsa-miR-302d-3p</a>  |
| 233 | 81 | <a href="#">hsa-miR-302c-3p</a>  |
| 234 | 81 | <a href="#">hsa-miR-302b-3p</a>  |
| 235 | 81 | <a href="#">hsa-miR-302a-3p</a>  |
| 236 | 81 | <a href="#">hsa-miR-3529-3p</a>  |
| 237 | 81 | <a href="#">hsa-miR-3973</a>     |
| 238 | 81 | <a href="#">hsa-miR-7108-5p</a>  |
| 239 | 81 | <a href="#">hsa-miR-6728-3p</a>  |
| 240 | 81 | <a href="#">hsa-miR-325</a>      |
| 241 | 80 | <a href="#">hsa-miR-595</a>      |
| 242 | 80 | <a href="#">hsa-miR-561-3p</a>   |
| 243 | 80 | <a href="#">hsa-miR-4483</a>     |
| 244 | 80 | <a href="#">hsa-miR-3680-3p</a>  |
| 245 | 80 | <a href="#">hsa-miR-7-2-3p</a>   |
| 246 | 80 | <a href="#">hsa-miR-7-1-3p</a>   |
| 247 | 80 | <a href="#">hsa-miR-28-3p</a>    |
| 248 | 80 | <a href="#">hsa-miR-6507-3p</a>  |
| 249 | 80 | <a href="#">hsa-miR-20a-3p</a>   |
| 250 | 80 | <a href="#">hsa-miR-3942-5p</a>  |
| 251 | 80 | <a href="#">hsa-miR-421</a>      |
| 252 | 80 | <a href="#">hsa-miR-647</a>      |
| 253 | 80 | <a href="#">hsa-miR-627-5p</a>   |
| 254 | 80 | <a href="#">hsa-miR-8068</a>     |

|     |    |                                  |
|-----|----|----------------------------------|
| 255 | 80 | <a href="#">hsa-let-7c-3p</a>    |
| 256 | 80 | <a href="#">hsa-miR-641</a>      |
| 257 | 80 | <a href="#">hsa-miR-3617-5p</a>  |
| 258 | 80 | <a href="#">hsa-miR-346</a>      |
| 259 | 80 | <a href="#">hsa-miR-5087</a>     |
| 260 | 80 | <a href="#">hsa-miR-519c-3p</a>  |
| 261 | 80 | <a href="#">hsa-miR-519b-3p</a>  |
| 262 | 80 | <a href="#">hsa-miR-519a-3p</a>  |
| 263 | 80 | <a href="#">hsa-miR-3606-3p</a>  |
| 264 | 79 | <a href="#">hsa-miR-4531</a>     |
| 265 | 79 | <a href="#">hsa-miR-100-3p</a>   |
| 266 | 79 | <a href="#">hsa-miR-6863</a>     |
| 267 | 79 | <a href="#">hsa-miR-3941</a>     |
| 268 | 79 | <a href="#">hsa-miR-23c</a>      |
| 269 | 79 | <a href="#">hsa-miR-23b-3p</a>   |
| 270 | 79 | <a href="#">hsa-miR-23a-3p</a>   |
| 271 | 79 | <a href="#">hsa-miR-30e-3p</a>   |
| 272 | 79 | <a href="#">hsa-miR-30d-3p</a>   |
| 273 | 79 | <a href="#">hsa-miR-30a-3p</a>   |
| 274 | 79 | <a href="#">hsa-miR-29b-1-5p</a> |
| 275 | 79 | <a href="#">hsa-miR-380-3p</a>   |
| 276 | 79 | <a href="#">hsa-miR-122b-5p</a>  |
| 277 | 79 | <a href="#">hsa-miR-571</a>      |
| 278 | 78 | <a href="#">hsa-miR-6776-3p</a>  |
| 279 | 78 | <a href="#">hsa-miR-6719-3p</a>  |
| 280 | 78 | <a href="#">hsa-miR-3910</a>     |
| 281 | 78 | <a href="#">hsa-miR-6790-5p</a>  |
| 282 | 78 | <a href="#">hsa-miR-4658</a>     |
| 283 | 78 | <a href="#">hsa-miR-1303</a>     |
| 284 | 78 | <a href="#">hsa-miR-1468-3p</a>  |
| 285 | 78 | <a href="#">hsa-miR-1297</a>     |
| 286 | 78 | <a href="#">hsa-miR-4733-3p</a>  |
| 287 | 78 | <a href="#">hsa-miR-646</a>      |
| 288 | 78 | <a href="#">hsa-miR-1184</a>     |
| 289 | 78 | <a href="#">hsa-miR-4714-5p</a>  |
| 290 | 78 | <a href="#">hsa-miR-145-3p</a>   |
| 291 | 78 | <a href="#">hsa-miR-6875-5p</a>  |
| 292 | 78 | <a href="#">hsa-miR-5047</a>     |
| 293 | 78 | <a href="#">hsa-miR-580-3p</a>   |
| 294 | 78 | <a href="#">hsa-miR-4801</a>     |
| 295 | 77 | <a href="#">hsa-miR-297</a>      |
| 296 | 77 | <a href="#">hsa-miR-514b-3p</a>  |
| 297 | 77 | <a href="#">hsa-miR-514a-3p</a>  |

|     |    |                                   |
|-----|----|-----------------------------------|
| 298 | 77 | <a href="#">hsa-miR-3658</a>      |
| 299 | 77 | <a href="#">hsa-miR-499b-3p</a>   |
| 300 | 77 | <a href="#">hsa-miR-499a-3p</a>   |
| 301 | 77 | <a href="#">hsa-miR-8081</a>      |
| 302 | 77 | <a href="#">hsa-miR-4694-5p</a>   |
| 303 | 77 | <a href="#">hsa-miR-4709-5p</a>   |
| 304 | 77 | <a href="#">hsa-miR-7112-3p</a>   |
| 305 | 77 | <a href="#">hsa-miR-4786-3p</a>   |
| 306 | 77 | <a href="#">hsa-miR-520d-3p</a>   |
| 307 | 77 | <a href="#">hsa-miR-520a-3p</a>   |
| 308 | 77 | <a href="#">hsa-miR-8485</a>      |
| 309 | 77 | <a href="#">hsa-miR-1293</a>      |
| 310 | 77 | <a href="#">hsa-miR-3143</a>      |
| 311 | 77 | <a href="#">hsa-miR-1250-3p</a>   |
| 312 | 77 | <a href="#">hsa-miR-1231</a>      |
| 313 | 77 | <a href="#">hsa-miR-4731-3p</a>   |
| 314 | 77 | <a href="#">hsa-miR-651-5p</a>    |
| 315 | 76 | <a href="#">hsa-miR-4719</a>      |
| 316 | 76 | <a href="#">hsa-miR-411-3p</a>    |
| 317 | 76 | <a href="#">hsa-miR-379-3p</a>    |
| 318 | 76 | <a href="#">hsa-miR-4659b-5p</a>  |
| 319 | 76 | <a href="#">hsa-miR-521</a>       |
| 320 | 76 | <a href="#">hsa-miR-4799-5p</a>   |
| 321 | 76 | <a href="#">hsa-miR-494-3p</a>    |
| 322 | 76 | <a href="#">hsa-miR-4774-5p</a>   |
| 323 | 76 | <a href="#">hsa-miR-219a-2-3p</a> |
| 324 | 76 | <a href="#">hsa-miR-3650</a>      |
| 325 | 76 | <a href="#">hsa-miR-376b-3p</a>   |
| 326 | 76 | <a href="#">hsa-miR-376a-3p</a>   |
| 327 | 76 | <a href="#">hsa-miR-144-3p</a>    |
| 328 | 76 | <a href="#">hsa-miR-302d-5p</a>   |
| 329 | 76 | <a href="#">hsa-miR-302b-5p</a>   |
| 330 | 76 | <a href="#">hsa-miR-508-3p</a>    |
| 331 | 76 | <a href="#">hsa-miR-5582-3p</a>   |
| 332 | 75 | <a href="#">hsa-miR-3614-3p</a>   |
| 333 | 75 | <a href="#">hsa-miR-34c-3p</a>    |
| 334 | 75 | <a href="#">hsa-miR-6820-3p</a>   |
| 335 | 75 | <a href="#">hsa-miR-3164</a>      |
| 336 | 75 | <a href="#">hsa-miR-3688-5p</a>   |
| 337 | 75 | <a href="#">hsa-miR-130a-5p</a>   |
| 338 | 75 | <a href="#">hsa-miR-95-5p</a>     |
| 339 | 75 | <a href="#">hsa-miR-644a</a>      |
| 340 | 75 | <a href="#">hsa-miR-6828-5p</a>   |

|     |    |                                  |
|-----|----|----------------------------------|
| 341 | 75 | <a href="#">hsa-miR-6507-5p</a>  |
| 342 | 74 | <a href="#">hsa-miR-520e-3p</a>  |
| 343 | 74 | <a href="#">hsa-miR-520c-3p</a>  |
| 344 | 74 | <a href="#">hsa-miR-520b-3p</a>  |
| 345 | 74 | <a href="#">hsa-miR-373-3p</a>   |
| 346 | 74 | <a href="#">hsa-miR-372-3p</a>   |
| 347 | 74 | <a href="#">hsa-miR-4708-5p</a>  |
| 348 | 74 | <a href="#">hsa-miR-3606-5p</a>  |
| 349 | 74 | <a href="#">hsa-miR-892c-3p</a>  |
| 350 | 74 | <a href="#">hsa-miR-4676-3p</a>  |
| 351 | 74 | <a href="#">hsa-miR-452-5p</a>   |
| 352 | 74 | <a href="#">hsa-miR-4635</a>     |
| 353 | 74 | <a href="#">hsa-miR-4711-5p</a>  |
| 354 | 74 | <a href="#">hsa-miR-4659a-5p</a> |
| 355 | 74 | <a href="#">hsa-miR-219b-3p</a>  |
| 356 | 74 | <a href="#">hsa-miR-8055</a>     |
| 357 | 74 | <a href="#">hsa-miR-891a-3p</a>  |
| 358 | 74 | <a href="#">hsa-miR-1236-3p</a>  |
| 359 | 74 | <a href="#">hsa-miR-361-5p</a>   |
| 360 | 74 | <a href="#">hsa-miR-6818-5p</a>  |
| 361 | 74 | <a href="#">hsa-miR-147a</a>     |
| 362 | 74 | <a href="#">hsa-miR-3920</a>     |
| 363 | 73 | <a href="#">hsa-miR-1301-3p</a>  |
| 364 | 73 | <a href="#">hsa-miR-4429</a>     |
| 365 | 73 | <a href="#">hsa-miR-320d</a>     |
| 366 | 73 | <a href="#">hsa-miR-320c</a>     |
| 367 | 73 | <a href="#">hsa-miR-320b</a>     |
| 368 | 73 | <a href="#">hsa-miR-320a-3p</a>  |
| 369 | 73 | <a href="#">hsa-miR-4772-3p</a>  |
| 370 | 73 | <a href="#">hsa-miR-4762-5p</a>  |
| 371 | 73 | <a href="#">hsa-miR-4325</a>     |
| 372 | 73 | <a href="#">hsa-miR-374b-3p</a>  |
| 373 | 73 | <a href="#">hsa-miR-4758-5p</a>  |
| 374 | 73 | <a href="#">hsa-miR-3191-5p</a>  |
| 375 | 73 | <a href="#">hsa-miR-3177-5p</a>  |
| 376 | 73 | <a href="#">hsa-miR-382-5p</a>   |
| 377 | 73 | <a href="#">hsa-miR-4679</a>     |
| 378 | 73 | <a href="#">hsa-miR-522-3p</a>   |
| 379 | 73 | <a href="#">hsa-miR-224-3p</a>   |
| 380 | 73 | <a href="#">hsa-miR-3190-3p</a>  |
| 381 | 73 | <a href="#">hsa-miR-4795-3p</a>  |
| 382 | 73 | <a href="#">hsa-miR-6732-3p</a>  |
| 383 | 73 | <a href="#">hsa-miR-299-5p</a>   |

|     |    |                                   |
|-----|----|-----------------------------------|
| 384 | 73 | <a href="#">hsa-miR-12131</a>     |
| 385 | 73 | <a href="#">hsa-miR-3121-5p</a>   |
| 386 | 73 | <a href="#">hsa-miR-5700</a>      |
| 387 | 73 | <a href="#">hsa-miR-340-5p</a>    |
| 388 | 73 | <a href="#">hsa-miR-4460</a>      |
| 389 | 72 | <a href="#">hsa-miR-576-5p</a>    |
| 390 | 72 | <a href="#">hsa-miR-4789-5p</a>   |
| 391 | 72 | <a href="#">hsa-miR-6809-3p</a>   |
| 392 | 72 | <a href="#">hsa-miR-218-5p</a>    |
| 393 | 72 | <a href="#">hsa-miR-32-3p</a>     |
| 394 | 72 | <a href="#">hsa-miR-514a-5p</a>   |
| 395 | 72 | <a href="#">hsa-miR-3935</a>      |
| 396 | 72 | <a href="#">hsa-miR-466</a>       |
| 397 | 72 | <a href="#">hsa-miR-181d-5p</a>   |
| 398 | 72 | <a href="#">hsa-miR-6755-3p</a>   |
| 399 | 72 | <a href="#">hsa-miR-597-3p</a>    |
| 400 | 72 | <a href="#">hsa-miR-1257</a>      |
| 401 | 72 | <a href="#">hsa-miR-494-5p</a>    |
| 402 | 72 | <a href="#">hsa-miR-2053</a>      |
| 403 | 72 | <a href="#">hsa-miR-3618</a>      |
| 404 | 72 | <a href="#">hsa-miR-181a-2-3p</a> |
| 405 | 72 | <a href="#">hsa-miR-3664-5p</a>   |
| 406 | 72 | <a href="#">hsa-miR-3662</a>      |
| 407 | 72 | <a href="#">hsa-miR-6165</a>      |
| 408 | 72 | <a href="#">hsa-miR-12119</a>     |
| 409 | 72 | <a href="#">hsa-miR-4263</a>      |
| 410 | 71 | <a href="#">hsa-miR-6502-3p</a>   |
| 411 | 71 | <a href="#">hsa-miR-549a-3p</a>   |
| 412 | 71 | <a href="#">hsa-miR-432-5p</a>    |
| 413 | 71 | <a href="#">hsa-miR-587</a>       |
| 414 | 71 | <a href="#">hsa-miR-4652-3p</a>   |
| 415 | 71 | <a href="#">hsa-miR-597-5p</a>    |
| 416 | 71 | <a href="#">hsa-miR-6766-3p</a>   |
| 417 | 71 | <a href="#">hsa-miR-4782-3p</a>   |
| 418 | 71 | <a href="#">hsa-miR-219a-5p</a>   |
| 419 | 71 | <a href="#">hsa-miR-203a-3p</a>   |
| 420 | 71 | <a href="#">hsa-miR-1179</a>      |
| 421 | 71 | <a href="#">hsa-miR-1264</a>      |
| 422 | 71 | <a href="#">hsa-miR-3934-5p</a>   |
| 423 | 71 | <a href="#">hsa-miR-616-3p</a>    |
| 424 | 71 | <a href="#">hsa-miR-302a-5p</a>   |
| 425 | 70 | <a href="#">hsa-miR-498-3p</a>    |
| 426 | 70 | <a href="#">hsa-miR-627-3p</a>    |

|     |    |                                  |
|-----|----|----------------------------------|
| 427 | 70 | <a href="#">hsa-miR-511-5p</a>   |
| 428 | 70 | <a href="#">hsa-miR-583</a>      |
| 429 | 70 | <a href="#">hsa-miR-324-3p</a>   |
| 430 | 70 | <a href="#">hsa-miR-181c-5p</a>  |
| 431 | 70 | <a href="#">hsa-miR-181b-5p</a>  |
| 432 | 70 | <a href="#">hsa-miR-181a-5p</a>  |
| 433 | 70 | <a href="#">hsa-miR-20b-3p</a>   |
| 434 | 70 | <a href="#">hsa-miR-649</a>      |
| 435 | 70 | <a href="#">hsa-miR-3148</a>     |
| 436 | 70 | <a href="#">hsa-miR-590-3p</a>   |
| 437 | 70 | <a href="#">hsa-miR-10527-5p</a> |
| 438 | 70 | <a href="#">hsa-miR-1238-5p</a>  |
| 439 | 70 | <a href="#">hsa-miR-3130-3p</a>  |
| 440 | 70 | <a href="#">hsa-miR-410-5p</a>   |
| 441 | 70 | <a href="#">hsa-miR-323b-5p</a>  |
| 442 | 70 | <a href="#">hsa-miR-6811-3p</a>  |
| 443 | 70 | <a href="#">hsa-miR-5571-5p</a>  |
| 444 | 70 | <a href="#">hsa-miR-1244</a>     |
| 445 | 70 | <a href="#">hsa-miR-4495</a>     |
| 446 | 69 | <a href="#">hsa-miR-4660</a>     |
| 447 | 69 | <a href="#">hsa-miR-3911</a>     |
| 448 | 69 | <a href="#">hsa-miR-520h</a>     |
| 449 | 69 | <a href="#">hsa-miR-520g-3p</a>  |
| 450 | 69 | <a href="#">hsa-miR-3617-3p</a>  |
| 451 | 69 | <a href="#">hsa-miR-8073</a>     |
| 452 | 69 | <a href="#">hsa-miR-221-5p</a>   |
| 453 | 69 | <a href="#">hsa-miR-195-3p</a>   |
| 454 | 69 | <a href="#">hsa-miR-16-2-3p</a>  |
| 455 | 69 | <a href="#">hsa-miR-3908</a>     |
| 456 | 69 | <a href="#">hsa-miR-4328</a>     |
| 457 | 69 | <a href="#">hsa-miR-942-5p</a>   |
| 458 | 69 | <a href="#">hsa-miR-4295</a>     |
| 459 | 69 | <a href="#">hsa-miR-3666</a>     |
| 460 | 69 | <a href="#">hsa-miR-301b-3p</a>  |
| 461 | 69 | <a href="#">hsa-miR-301a-3p</a>  |
| 462 | 69 | <a href="#">hsa-miR-130b-3p</a>  |
| 463 | 69 | <a href="#">hsa-miR-130a-3p</a>  |
| 464 | 69 | <a href="#">hsa-miR-4502</a>     |
| 465 | 69 | <a href="#">hsa-miR-3129-5p</a>  |
| 466 | 69 | <a href="#">hsa-miR-199b-3p</a>  |
| 467 | 69 | <a href="#">hsa-miR-199a-3p</a>  |
| 468 | 69 | <a href="#">hsa-miR-548an</a>    |
| 469 | 69 | <a href="#">hsa-miR-499a-5p</a>  |

|     |    |                                  |
|-----|----|----------------------------------|
| 470 | 69 | <a href="#">hsa-miR-7110-3p</a>  |
| 471 | 68 | <a href="#">hsa-miR-561-5p</a>   |
| 472 | 68 | <a href="#">hsa-miR-4703-3p</a>  |
| 473 | 68 | <a href="#">hsa-miR-1178-5p</a>  |
| 474 | 68 | <a href="#">hsa-miR-3152-3p</a>  |
| 475 | 68 | <a href="#">hsa-miR-1181</a>     |
| 476 | 68 | <a href="#">hsa-miR-4803</a>     |
| 477 | 68 | <a href="#">hsa-miR-2276-3p</a>  |
| 478 | 68 | <a href="#">hsa-miR-3611</a>     |
| 479 | 68 | <a href="#">hsa-miR-6817-5p</a>  |
| 480 | 68 | <a href="#">hsa-miR-4769-3p</a>  |
| 481 | 68 | <a href="#">hsa-miR-198</a>      |
| 482 | 68 | <a href="#">hsa-miR-16-1-3p</a>  |
| 483 | 68 | <a href="#">hsa-miR-4690-5p</a>  |
| 484 | 68 | <a href="#">hsa-miR-643</a>      |
| 485 | 68 | <a href="#">hsa-miR-924</a>      |
| 486 | 68 | <a href="#">hsa-miR-4255</a>     |
| 487 | 68 | <a href="#">hsa-miR-26b-5p</a>   |
| 488 | 68 | <a href="#">hsa-miR-26a-5p</a>   |
| 489 | 68 | <a href="#">hsa-miR-4469</a>     |
| 490 | 68 | <a href="#">hsa-miR-12114</a>    |
| 491 | 68 | <a href="#">hsa-miR-4738-3p</a>  |
| 492 | 68 | <a href="#">hsa-miR-29b-2-5p</a> |
| 493 | 68 | <a href="#">hsa-miR-2355-3p</a>  |
| 494 | 68 | <a href="#">hsa-miR-4698</a>     |
| 495 | 68 | <a href="#">hsa-miR-33b-5p</a>   |
| 496 | 68 | <a href="#">hsa-miR-33a-5p</a>   |
| 497 | 68 | <a href="#">hsa-miR-192-3p</a>   |
| 498 | 68 | <a href="#">hsa-miR-767-5p</a>   |
| 499 | 67 | <a href="#">hsa-miR-2113</a>     |
| 500 | 67 | <a href="#">hsa-miR-498-5p</a>   |
| 501 | 67 | <a href="#">hsa-miR-664a-3p</a>  |
| 502 | 67 | <a href="#">hsa-miR-4468</a>     |
| 503 | 67 | <a href="#">hsa-miR-4743-3p</a>  |
| 504 | 67 | <a href="#">hsa-miR-454-3p</a>   |
| 505 | 67 | <a href="#">hsa-miR-9985</a>     |
| 506 | 67 | <a href="#">hsa-miR-27b-3p</a>   |
| 507 | 67 | <a href="#">hsa-miR-27a-3p</a>   |
| 508 | 67 | <a href="#">hsa-miR-567</a>      |
| 509 | 67 | <a href="#">hsa-miR-6739-3p</a>  |
| 510 | 67 | <a href="#">hsa-miR-122-5p</a>   |
| 511 | 67 | <a href="#">hsa-miR-7854-3p</a>  |
| 512 | 67 | <a href="#">hsa-miR-6797-3p</a>  |

|     |    |                                   |
|-----|----|-----------------------------------|
| 513 | 67 | <a href="#">hsa-miR-136-5p</a>    |
| 514 | 67 | <a href="#">hsa-miR-181c-3p</a>   |
| 515 | 67 | <a href="#">hsa-miR-452-3p</a>    |
| 516 | 67 | <a href="#">hsa-miR-10395-5p</a>  |
| 517 | 67 | <a href="#">hsa-miR-4291</a>      |
| 518 | 67 | <a href="#">hsa-miR-6733-3p</a>   |
| 519 | 67 | <a href="#">hsa-miR-507</a>       |
| 520 | 67 | <a href="#">hsa-miR-4445-5p</a>   |
| 521 | 66 | <a href="#">hsa-miR-126-5p</a>    |
| 522 | 66 | <a href="#">hsa-miR-4666b</a>     |
| 523 | 66 | <a href="#">hsa-miR-552-3p</a>    |
| 524 | 66 | <a href="#">hsa-miR-6832-5p</a>   |
| 525 | 66 | <a href="#">hsa-miR-203a-5p</a>   |
| 526 | 66 | <a href="#">hsa-miR-6792-3p</a>   |
| 527 | 66 | <a href="#">hsa-miR-10522-5p</a>  |
| 528 | 66 | <a href="#">hsa-miR-6802-5p</a>   |
| 529 | 66 | <a href="#">hsa-miR-548b-3p</a>   |
| 530 | 66 | <a href="#">hsa-miR-5585-3p</a>   |
| 531 | 66 | <a href="#">hsa-miR-4691-5p</a>   |
| 532 | 66 | <a href="#">hsa-miR-4729</a>      |
| 533 | 66 | <a href="#">hsa-miR-4465</a>      |
| 534 | 66 | <a href="#">hsa-miR-548ar-3p</a>  |
| 535 | 66 | <a href="#">hsa-miR-573</a>       |
| 536 | 66 | <a href="#">hsa-miR-338-3p</a>    |
| 537 | 66 | <a href="#">hsa-miR-208a-5p</a>   |
| 538 | 66 | <a href="#">hsa-miR-4264</a>      |
| 539 | 66 | <a href="#">hsa-miR-1277-5p</a>   |
| 540 | 66 | <a href="#">hsa-miR-6837-3p</a>   |
| 541 | 66 | <a href="#">hsa-miR-5197-3p</a>   |
| 542 | 65 | <a href="#">hsa-miR-208b-5p</a>   |
| 543 | 65 | <a href="#">hsa-miR-511-3p</a>    |
| 544 | 65 | <a href="#">hsa-miR-103a-1-5p</a> |
| 545 | 65 | <a href="#">hsa-miR-7161-5p</a>   |
| 546 | 65 | <a href="#">hsa-miR-500a-5p</a>   |
| 547 | 65 | <a href="#">hsa-miR-142-3p</a>    |
| 548 | 65 | <a href="#">hsa-miR-548az-3p</a>  |
| 549 | 65 | <a href="#">hsa-miR-4682</a>      |
| 550 | 65 | <a href="#">hsa-miR-6529-5p</a>   |
| 551 | 65 | <a href="#">hsa-miR-1227-3p</a>   |
| 552 | 65 | <a href="#">hsa-miR-103a-2-5p</a> |
| 553 | 65 | <a href="#">hsa-miR-6510-5p</a>   |
| 554 | 65 | <a href="#">hsa-miR-5010-3p</a>   |
| 555 | 65 | <a href="#">hsa-miR-4536-5p</a>   |

|     |    |                                  |
|-----|----|----------------------------------|
| 556 | 65 | <a href="#">hsa-miR-4506</a>     |
| 557 | 65 | <a href="#">hsa-miR-557</a>      |
| 558 | 65 | <a href="#">hsa-miR-1322</a>     |
| 559 | 65 | <a href="#">hsa-miR-216a-3p</a>  |
| 560 | 65 | <a href="#">hsa-miR-128-3p</a>   |
| 561 | 65 | <a href="#">hsa-miR-362-3p</a>   |
| 562 | 65 | <a href="#">hsa-miR-6806-5p</a>  |
| 563 | 65 | <a href="#">hsa-miR-4727-3p</a>  |
| 564 | 65 | <a href="#">hsa-miR-542-3p</a>   |
| 565 | 65 | <a href="#">hsa-miR-5692c</a>    |
| 566 | 65 | <a href="#">hsa-miR-5692b</a>    |
| 567 | 65 | <a href="#">hsa-miR-944</a>      |
| 568 | 65 | <a href="#">hsa-miR-6796-3p</a>  |
| 569 | 65 | <a href="#">hsa-miR-218-2-3p</a> |
| 570 | 65 | <a href="#">hsa-miR-513b-5p</a>  |
| 571 | 65 | <a href="#">hsa-miR-3189-3p</a>  |
| 572 | 65 | <a href="#">hsa-miR-5680</a>     |
| 573 | 64 | <a href="#">hsa-miR-551b-5p</a>  |
| 574 | 64 | <a href="#">hsa-miR-7856-5p</a>  |
| 575 | 64 | <a href="#">hsa-miR-574-5p</a>   |
| 576 | 64 | <a href="#">hsa-miR-6833-5p</a>  |
| 577 | 64 | <a href="#">hsa-miR-3977</a>     |
| 578 | 64 | <a href="#">hsa-miR-519d-5p</a>  |
| 579 | 64 | <a href="#">hsa-miR-589-5p</a>   |
| 580 | 64 | <a href="#">hsa-miR-367-5p</a>   |
| 581 | 64 | <a href="#">hsa-miR-4999-3p</a>  |
| 582 | 64 | <a href="#">hsa-miR-6761-5p</a>  |
| 583 | 64 | <a href="#">hsa-miR-618</a>      |
| 584 | 64 | <a href="#">hsa-miR-12117</a>    |
| 585 | 64 | <a href="#">hsa-miR-4756-3p</a>  |
| 586 | 64 | <a href="#">hsa-miR-4797-3p</a>  |
| 587 | 63 | <a href="#">hsa-miR-3126-5p</a>  |
| 588 | 63 | <a href="#">hsa-miR-524-5p</a>   |
| 589 | 63 | <a href="#">hsa-miR-520d-5p</a>  |
| 590 | 63 | <a href="#">hsa-miR-4275</a>     |
| 591 | 63 | <a href="#">hsa-miR-4677-5p</a>  |
| 592 | 63 | <a href="#">hsa-miR-584-5p</a>   |
| 593 | 63 | <a href="#">hsa-miR-548f-3p</a>  |
| 594 | 63 | <a href="#">hsa-miR-548e-3p</a>  |
| 595 | 63 | <a href="#">hsa-miR-548bc</a>    |
| 596 | 63 | <a href="#">hsa-miR-383-3p</a>   |
| 597 | 63 | <a href="#">hsa-miR-506-3p</a>   |
| 598 | 63 | <a href="#">hsa-miR-124-3p</a>   |

|     |    |                                  |
|-----|----|----------------------------------|
| 599 | 63 | <a href="#">hsa-miR-548a-3p</a>  |
| 600 | 63 | <a href="#">hsa-miR-6716-5p</a>  |
| 601 | 63 | <a href="#">hsa-miR-323a-3p</a>  |
| 602 | 63 | <a href="#">hsa-miR-323a-5p</a>  |
| 603 | 63 | <a href="#">hsa-miR-7844-5p</a>  |
| 604 | 62 | <a href="#">hsa-miR-7702</a>     |
| 605 | 62 | <a href="#">hsa-miR-6513-3p</a>  |
| 606 | 62 | <a href="#">hsa-miR-4711-3p</a>  |
| 607 | 62 | <a href="#">hsa-miR-19b-2-5p</a> |
| 608 | 62 | <a href="#">hsa-miR-19b-1-5p</a> |
| 609 | 62 | <a href="#">hsa-miR-19a-5p</a>   |
| 610 | 62 | <a href="#">hsa-miR-5192</a>     |
| 611 | 62 | <a href="#">hsa-miR-4260</a>     |
| 612 | 62 | <a href="#">hsa-miR-578</a>      |
| 613 | 62 | <a href="#">hsa-miR-3622b-3p</a> |
| 614 | 62 | <a href="#">hsa-miR-3622a-3p</a> |
| 615 | 62 | <a href="#">hsa-miR-4307</a>     |
| 616 | 62 | <a href="#">hsa-miR-380-5p</a>   |
| 617 | 62 | <a href="#">hsa-miR-520a-5p</a>  |
| 618 | 62 | <a href="#">hsa-miR-1324</a>     |
| 619 | 62 | <a href="#">hsa-miR-548ay-3p</a> |
| 620 | 62 | <a href="#">hsa-miR-548at-3p</a> |
| 621 | 62 | <a href="#">hsa-miR-655-5p</a>   |
| 622 | 62 | <a href="#">hsa-miR-3620-3p</a>  |
| 623 | 61 | <a href="#">hsa-miR-5580-3p</a>  |
| 624 | 61 | <a href="#">hsa-miR-4742-5p</a>  |
| 625 | 61 | <a href="#">hsa-miR-543</a>      |
| 626 | 61 | <a href="#">hsa-miR-548u</a>     |
| 627 | 61 | <a href="#">hsa-miR-31-5p</a>    |
| 628 | 61 | <a href="#">hsa-let-7g-3p</a>    |
| 629 | 61 | <a href="#">hsa-let-7a-2-3p</a>  |
| 630 | 61 | <a href="#">hsa-miR-5196-5p</a>  |
| 631 | 61 | <a href="#">hsa-miR-4747-5p</a>  |
| 632 | 61 | <a href="#">hsa-miR-3616-5p</a>  |
| 633 | 61 | <a href="#">hsa-miR-532-5p</a>   |
| 634 | 61 | <a href="#">hsa-miR-15b-3p</a>   |
| 635 | 61 | <a href="#">hsa-miR-1265</a>     |
| 636 | 61 | <a href="#">hsa-miR-6826-5p</a>  |
| 637 | 61 | <a href="#">hsa-miR-4312</a>     |
| 638 | 61 | <a href="#">hsa-miR-3134</a>     |
| 639 | 61 | <a href="#">hsa-miR-642b-3p</a>  |
| 640 | 61 | <a href="#">hsa-miR-642a-3p</a>  |
| 641 | 61 | <a href="#">hsa-miR-148a-5p</a>  |

|     |    |                                  |
|-----|----|----------------------------------|
| 642 | 61 | <a href="#">hsa-miR-3928-3p</a>  |
| 643 | 61 | <a href="#">hsa-miR-4716-5p</a>  |
| 644 | 61 | <a href="#">hsa-miR-4748</a>     |
| 645 | 61 | <a href="#">hsa-miR-4509</a>     |
| 646 | 61 | <a href="#">hsa-miR-544a</a>     |
| 647 | 61 | <a href="#">hsa-miR-4289</a>     |
| 648 | 60 | <a href="#">hsa-miR-218-1-3p</a> |
| 649 | 60 | <a href="#">hsa-miR-581</a>      |
| 650 | 60 | <a href="#">hsa-miR-5690</a>     |
| 651 | 60 | <a href="#">hsa-miR-3163</a>     |
| 652 | 60 | <a href="#">hsa-miR-4668-3p</a>  |
| 653 | 60 | <a href="#">hsa-miR-5702</a>     |
| 654 | 60 | <a href="#">hsa-miR-548v</a>     |
| 655 | 60 | <a href="#">hsa-miR-4464</a>     |
| 656 | 60 | <a href="#">hsa-miR-495-5p</a>   |
| 657 | 60 | <a href="#">hsa-miR-6771-3p</a>  |
| 658 | 60 | <a href="#">hsa-miR-153-5p</a>   |
| 659 | 60 | <a href="#">hsa-miR-29a-5p</a>   |
| 660 | 60 | <a href="#">hsa-miR-376c-3p</a>  |
| 661 | 60 | <a href="#">hsa-miR-876-3p</a>   |
| 662 | 60 | <a href="#">hsa-miR-4793-5p</a>  |
| 663 | 60 | <a href="#">hsa-miR-6782-3p</a>  |
| 664 | 60 | <a href="#">hsa-miR-519e-5p</a>  |
| 665 | 60 | <a href="#">hsa-miR-515-5p</a>   |
| 666 | 60 | <a href="#">hsa-miR-1197</a>     |
| 667 | 60 | <a href="#">hsa-miR-10b-3p</a>   |
| 668 | 60 | <a href="#">hsa-miR-4670-3p</a>  |
| 669 | 60 | <a href="#">hsa-miR-555</a>      |
| 670 | 60 | <a href="#">hsa-miR-3137</a>     |
| 671 | 60 | <a href="#">hsa-miR-3619-5p</a>  |
| 672 | 60 | <a href="#">hsa-miR-3161</a>     |
| 673 | 59 | <a href="#">hsa-miR-5011-3p</a>  |
| 674 | 59 | <a href="#">hsa-miR-607</a>      |
| 675 | 59 | <a href="#">hsa-miR-450b-5p</a>  |
| 676 | 59 | <a href="#">hsa-miR-12120</a>    |
| 677 | 59 | <a href="#">hsa-miR-6892-5p</a>  |
| 678 | 59 | <a href="#">hsa-miR-4267</a>     |
| 679 | 59 | <a href="#">hsa-miR-4303</a>     |
| 680 | 59 | <a href="#">hsa-miR-329-3p</a>   |
| 681 | 59 | <a href="#">hsa-miR-2681-5p</a>  |
| 682 | 59 | <a href="#">hsa-miR-6884-3p</a>  |
| 683 | 59 | <a href="#">hsa-miR-6847-3p</a>  |
| 684 | 59 | <a href="#">hsa-miR-138-5p</a>   |



|     |    |                                  |
|-----|----|----------------------------------|
| 685 | 59 | <a href="#">hsa-miR-4633-5p</a>  |
| 686 | 59 | <a href="#">hsa-miR-140-3p</a>   |
| 687 | 59 | <a href="#">hsa-miR-541-5p</a>   |
| 688 | 59 | <a href="#">hsa-miR-212-3p</a>   |
| 689 | 59 | <a href="#">hsa-miR-132-3p</a>   |
| 690 | 59 | <a href="#">hsa-miR-4793-3p</a>  |
| 691 | 59 | <a href="#">hsa-miR-592</a>      |
| 692 | 59 | <a href="#">hsa-miR-6076</a>     |
| 693 | 59 | <a href="#">hsa-miR-659-3p</a>   |
| 694 | 59 | <a href="#">hsa-miR-6801-5p</a>  |
| 695 | 59 | <a href="#">hsa-miR-10393-3p</a> |
| 696 | 59 | <a href="#">hsa-miR-4280</a>     |
| 697 | 58 | <a href="#">hsa-miR-92a-1-5p</a> |
| 698 | 58 | <a href="#">hsa-miR-770-5p</a>   |
| 699 | 58 | <a href="#">hsa-miR-4712-5p</a>  |
| 700 | 58 | <a href="#">hsa-miR-4694-3p</a>  |
| 701 | 58 | <a href="#">hsa-miR-138-2-3p</a> |
| 702 | 58 | <a href="#">hsa-miR-1-5p</a>     |
| 703 | 58 | <a href="#">hsa-miR-3681-3p</a>  |
| 704 | 58 | <a href="#">hsa-miR-934</a>      |
| 705 | 58 | <a href="#">hsa-miR-3180-5p</a>  |
| 706 | 58 | <a href="#">hsa-miR-3121-3p</a>  |
| 707 | 58 | <a href="#">hsa-miR-922</a>      |
| 708 | 58 | <a href="#">hsa-miR-4305</a>     |
| 709 | 58 | <a href="#">hsa-miR-520f-5p</a>  |
| 710 | 58 | <a href="#">hsa-miR-3646</a>     |
| 711 | 58 | <a href="#">hsa-miR-937-5p</a>   |
| 712 | 58 | <a href="#">hsa-miR-4426</a>     |
| 713 | 58 | <a href="#">hsa-miR-4766-5p</a>  |
| 714 | 58 | <a href="#">hsa-miR-668-3p</a>   |
| 715 | 58 | <a href="#">hsa-miR-6755-5p</a>  |
| 716 | 58 | <a href="#">hsa-miR-563</a>      |
| 717 | 58 | <a href="#">hsa-miR-3923</a>     |
| 718 | 58 | <a href="#">hsa-miR-656-5p</a>   |
| 719 | 58 | <a href="#">hsa-miR-369-3p</a>   |
| 720 | 58 | <a href="#">hsa-miR-329-5p</a>   |
| 721 | 57 | <a href="#">hsa-miR-9-3p</a>     |
| 722 | 57 | <a href="#">hsa-miR-4680-3p</a>  |
| 723 | 57 | <a href="#">hsa-miR-562</a>      |
| 724 | 57 | <a href="#">hsa-miR-6134</a>     |
| 725 | 57 | <a href="#">hsa-miR-3972</a>     |
| 726 | 57 | <a href="#">hsa-miR-518c-5p</a>  |
| 727 | 57 | <a href="#">hsa-miR-1202</a>     |

|     |    |                                  |
|-----|----|----------------------------------|
| 728 | 57 | <a href="#">hsa-miR-1911-3p</a>  |
| 729 | 57 | <a href="#">hsa-miR-4650-3p</a>  |
| 730 | 57 | <a href="#">hsa-miR-5693</a>     |
| 731 | 57 | <a href="#">hsa-miR-7109-3p</a>  |
| 732 | 57 | <a href="#">hsa-miR-891b</a>     |
| 733 | 57 | <a href="#">hsa-miR-4697-3p</a>  |
| 734 | 57 | <a href="#">hsa-miR-4463</a>     |
| 735 | 57 | <a href="#">hsa-miR-4456</a>     |
| 736 | 57 | <a href="#">hsa-miR-1252-3p</a>  |
| 737 | 57 | <a href="#">hsa-miR-4789-3p</a>  |
| 738 | 57 | <a href="#">hsa-miR-217-3p</a>   |
| 739 | 57 | <a href="#">hsa-miR-3976</a>     |
| 740 | 57 | <a href="#">hsa-miR-3978</a>     |
| 741 | 57 | <a href="#">hsa-miR-4661-5p</a>  |
| 742 | 57 | <a href="#">hsa-miR-338-5p</a>   |
| 743 | 57 | <a href="#">hsa-miR-125a-3p</a>  |
| 744 | 57 | <a href="#">hsa-miR-525-5p</a>   |
| 745 | 56 | <a href="#">hsa-miR-4662a-3p</a> |
| 746 | 56 | <a href="#">hsa-miR-4638-3p</a>  |
| 747 | 56 | <a href="#">hsa-miR-3918</a>     |
| 748 | 56 | <a href="#">hsa-miR-31-3p</a>    |
| 749 | 56 | <a href="#">hsa-miR-4705</a>     |
| 750 | 56 | <a href="#">hsa-miR-3659</a>     |
| 751 | 56 | <a href="#">hsa-miR-154-3p</a>   |
| 752 | 56 | <a href="#">hsa-miR-12135</a>    |
| 753 | 56 | <a href="#">hsa-miR-7153-3p</a>  |
| 754 | 56 | <a href="#">hsa-miR-4432</a>     |
| 755 | 56 | <a href="#">hsa-miR-3064-3p</a>  |
| 756 | 56 | <a href="#">hsa-miR-548ax</a>    |
| 757 | 56 | <a href="#">hsa-miR-548ao-5p</a> |
| 758 | 56 | <a href="#">hsa-miR-4712-3p</a>  |
| 759 | 56 | <a href="#">hsa-miR-214-3p</a>   |
| 760 | 56 | <a href="#">hsa-miR-4699-3p</a>  |
| 761 | 56 | <a href="#">hsa-miR-570-3p</a>   |
| 762 | 55 | <a href="#">hsa-miR-3675-3p</a>  |
| 763 | 55 | <a href="#">hsa-miR-422a</a>     |
| 764 | 55 | <a href="#">hsa-miR-378i</a>     |
| 765 | 55 | <a href="#">hsa-miR-378h</a>     |
| 766 | 55 | <a href="#">hsa-miR-378f</a>     |
| 767 | 55 | <a href="#">hsa-miR-378e</a>     |
| 768 | 55 | <a href="#">hsa-miR-378d</a>     |
| 769 | 55 | <a href="#">hsa-miR-378c</a>     |
| 770 | 55 | <a href="#">hsa-miR-378b</a>     |

|     |    |                                  |
|-----|----|----------------------------------|
| 771 | 55 | <a href="#">hsa-miR-378a-3p</a>  |
| 772 | 55 | <a href="#">hsa-miR-4673</a>     |
| 773 | 55 | <a href="#">hsa-miR-214-5p</a>   |
| 774 | 55 | <a href="#">hsa-miR-4678</a>     |
| 775 | 55 | <a href="#">hsa-miR-4760-5p</a>  |
| 776 | 55 | <a href="#">hsa-miR-520e-5p</a>  |
| 777 | 55 | <a href="#">hsa-miR-6877-3p</a>  |
| 778 | 55 | <a href="#">hsa-miR-6516-5p</a>  |
| 779 | 55 | <a href="#">hsa-miR-140-5p</a>   |
| 780 | 55 | <a href="#">hsa-miR-26a-2-3p</a> |
| 781 | 55 | <a href="#">hsa-miR-26a-1-3p</a> |
| 782 | 55 | <a href="#">hsa-miR-5003-3p</a>  |
| 783 | 55 | <a href="#">hsa-miR-4727-5p</a>  |
| 784 | 55 | <a href="#">hsa-miR-582-5p</a>   |
| 785 | 55 | <a href="#">hsa-miR-6740-3p</a>  |
| 786 | 55 | <a href="#">hsa-miR-190a-3p</a>  |
| 787 | 55 | <a href="#">hsa-miR-1269b</a>    |
| 788 | 55 | <a href="#">hsa-miR-1269a</a>    |
| 789 | 54 | <a href="#">hsa-miR-6079</a>     |
| 790 | 54 | <a href="#">hsa-miR-12129</a>    |
| 791 | 54 | <a href="#">hsa-miR-151a-3p</a>  |
| 792 | 54 | <a href="#">hsa-miR-5697</a>     |
| 793 | 54 | <a href="#">hsa-miR-1276</a>     |
| 794 | 54 | <a href="#">hsa-miR-4691-3p</a>  |
| 795 | 54 | <a href="#">hsa-miR-3184-3p</a>  |
| 796 | 54 | <a href="#">hsa-miR-761</a>      |
| 797 | 54 | <a href="#">hsa-miR-5695</a>     |
| 798 | 54 | <a href="#">hsa-miR-9851-3p</a>  |
| 799 | 54 | <a href="#">hsa-miR-4503</a>     |
| 800 | 54 | <a href="#">hsa-miR-3688-3p</a>  |
| 801 | 54 | <a href="#">hsa-miR-6841-5p</a>  |
| 802 | 54 | <a href="#">hsa-miR-4496</a>     |
| 803 | 54 | <a href="#">hsa-miR-7156-3p</a>  |
| 804 | 54 | <a href="#">hsa-miR-5002-5p</a>  |
| 805 | 54 | <a href="#">hsa-miR-206</a>      |
| 806 | 54 | <a href="#">hsa-miR-1-3p</a>     |
| 807 | 54 | <a href="#">hsa-miR-6792-5p</a>  |
| 808 | 54 | <a href="#">hsa-miR-6750-3p</a>  |
| 809 | 54 | <a href="#">hsa-miR-15a-3p</a>   |
| 810 | 54 | <a href="#">hsa-miR-4776-3p</a>  |
| 811 | 54 | <a href="#">hsa-miR-6514-3p</a>  |
| 812 | 54 | <a href="#">hsa-miR-1915-5p</a>  |
| 813 | 54 | <a href="#">hsa-miR-8062</a>     |

|     |    |                                   |
|-----|----|-----------------------------------|
| 814 | 54 | <a href="#">hsa-miR-3919</a>      |
| 815 | 54 | <a href="#">hsa-miR-4645-5p</a>   |
| 816 | 54 | <a href="#">hsa-miR-4272</a>      |
| 817 | 54 | <a href="#">hsa-miR-5683</a>      |
| 818 | 54 | <a href="#">hsa-miR-6819-3p</a>   |
| 819 | 54 | <a href="#">hsa-miR-6505-3p</a>   |
| 820 | 54 | <a href="#">hsa-miR-4511</a>      |
| 821 | 53 | <a href="#">hsa-miR-6849-3p</a>   |
| 822 | 53 | <a href="#">hsa-miR-3609</a>      |
| 823 | 53 | <a href="#">hsa-miR-219b-5p</a>   |
| 824 | 53 | <a href="#">hsa-miR-5572</a>      |
| 825 | 53 | <a href="#">hsa-miR-616-5p</a>    |
| 826 | 53 | <a href="#">hsa-miR-373-5p</a>    |
| 827 | 53 | <a href="#">hsa-miR-371b-5p</a>   |
| 828 | 53 | <a href="#">hsa-miR-376a-2-5p</a> |
| 829 | 53 | <a href="#">hsa-miR-12127</a>     |
| 830 | 53 | <a href="#">hsa-miR-7850-5p</a>   |
| 831 | 53 | <a href="#">hsa-miR-655-3p</a>    |
| 832 | 53 | <a href="#">hsa-miR-374c-5p</a>   |
| 833 | 53 | <a href="#">hsa-miR-5706</a>      |
| 834 | 53 | <a href="#">hsa-miR-4782-5p</a>   |
| 835 | 53 | <a href="#">hsa-miR-760</a>       |
| 836 | 53 | <a href="#">hsa-miR-1288-3p</a>   |
| 837 | 53 | <a href="#">hsa-miR-613</a>       |
| 838 | 53 | <a href="#">hsa-miR-593-5p</a>    |
| 839 | 53 | <a href="#">hsa-miR-4715-3p</a>   |
| 840 | 53 | <a href="#">hsa-miR-4477a</a>     |
| 841 | 53 | <a href="#">hsa-miR-659-5p</a>    |
| 842 | 53 | <a href="#">hsa-miR-6759-5p</a>   |
| 843 | 53 | <a href="#">hsa-miR-4261</a>      |
| 844 | 53 | <a href="#">hsa-miR-8061</a>      |
| 845 | 53 | <a href="#">hsa-miR-4529-5p</a>   |
| 846 | 52 | <a href="#">hsa-miR-196b-5p</a>   |
| 847 | 52 | <a href="#">hsa-miR-196a-5p</a>   |
| 848 | 52 | <a href="#">hsa-miR-620</a>       |
| 849 | 52 | <a href="#">hsa-miR-1270</a>      |
| 850 | 52 | <a href="#">hsa-miR-215-3p</a>    |
| 851 | 52 | <a href="#">hsa-miR-892a</a>      |
| 852 | 52 | <a href="#">hsa-let-7f-1-3p</a>   |
| 853 | 52 | <a href="#">hsa-miR-187-5p</a>    |
| 854 | 52 | <a href="#">hsa-miR-424-3p</a>    |
| 855 | 52 | <a href="#">hsa-miR-4451</a>      |
| 856 | 52 | <a href="#">hsa-miR-10523-5p</a>  |

|     |    |                                  |
|-----|----|----------------------------------|
| 857 | 52 | <a href="#">hsa-miR-372-5p</a>   |
| 858 | 52 | <a href="#">hsa-miR-4446-3p</a>  |
| 859 | 52 | <a href="#">hsa-miR-4693-5p</a>  |
| 860 | 52 | <a href="#">hsa-miR-12136</a>    |
| 861 | 52 | <a href="#">hsa-miR-223-5p</a>   |
| 862 | 52 | <a href="#">hsa-miR-548ah-5p</a> |
| 863 | 52 | <a href="#">hsa-miR-5579-5p</a>  |
| 864 | 52 | <a href="#">hsa-miR-210-3p</a>   |
| 865 | 52 | <a href="#">hsa-miR-7703</a>     |
| 866 | 52 | <a href="#">hsa-miR-22-5p</a>    |
| 867 | 52 | <a href="#">hsa-miR-193b-3p</a>  |
| 868 | 52 | <a href="#">hsa-miR-193a-3p</a>  |
| 869 | 52 | <a href="#">hsa-miR-6071</a>     |
| 870 | 52 | <a href="#">hsa-miR-5692a</a>    |
| 871 | 52 | <a href="#">hsa-miR-502-5p</a>   |
| 872 | 51 | <a href="#">hsa-miR-6730-5p</a>  |
| 873 | 51 | <a href="#">hsa-miR-3942-3p</a>  |
| 874 | 51 | <a href="#">hsa-miR-3924</a>     |
| 875 | 51 | <a href="#">hsa-miR-7849-3p</a>  |
| 876 | 51 | <a href="#">hsa-miR-6766-5p</a>  |
| 877 | 51 | <a href="#">hsa-miR-6756-5p</a>  |
| 878 | 51 | <a href="#">hsa-miR-331-5p</a>   |

|     |    |                                  |
|-----|----|----------------------------------|
| 879 | 51 | <a href="#">hsa-miR-155-5p</a>   |
| 880 | 51 | <a href="#">hsa-miR-4685-3p</a>  |
| 881 | 51 | <a href="#">hsa-miR-4287</a>     |
| 882 | 51 | <a href="#">hsa-miR-1183</a>     |
| 883 | 51 | <a href="#">hsa-miR-4316</a>     |
| 884 | 51 | <a href="#">hsa-miR-182-5p</a>   |
| 885 | 51 | <a href="#">hsa-miR-6852-3p</a>  |
| 886 | 51 | <a href="#">hsa-miR-654-3p</a>   |
| 887 | 51 | <a href="#">hsa-miR-4534</a>     |
| 888 | 51 | <a href="#">hsa-miR-487a-3p</a>  |
| 889 | 51 | <a href="#">hsa-miR-5197-5p</a>  |
| 890 | 51 | <a href="#">hsa-miR-4662a-5p</a> |
| 891 | 51 | <a href="#">hsa-miR-4470</a>     |
| 892 | 51 | <a href="#">hsa-miR-548ao-3p</a> |
| 893 | 50 | <a href="#">hsa-miR-6715b-3p</a> |
| 894 | 50 | <a href="#">hsa-miR-1266-3p</a>  |
| 895 | 50 | <a href="#">hsa-miR-4645-3p</a>  |
| 896 | 50 | <a href="#">hsa-miR-591</a>      |
| 897 | 50 | <a href="#">hsa-miR-150-3p</a>   |
| 898 | 50 | <a href="#">hsa-miR-12121</a>    |
| 899 | 50 | <a href="#">hsa-miR-6874-5p</a>  |
| 900 | 50 | <a href="#">hsa-miR-875-5p</a>   |
